# Supplementary material for: Synthesis and Pesticidal Activity of New Niacinamide Derivatives Containing a Flexible, Chiral Chain
Source: MDPI journal article supplement (doi:10.3390/molecules28010047), 2022-12-21
Supplement: s1 [file s1]

# Supplemental Materials

## Synthesis and Pesticidal Activity of New Niacinamide Derivatives Containing a Flexible, Chiral Chain

Zhe-Cheng Wei<sup>1</sup>, Qiao Wang<sup>1</sup>, Li-Jing Min<sup>2</sup>, Joanna Bajsa-Hirschel<sup>3</sup>, Charles L. Cantrell<sup>3</sup>, Liang Han<sup>2</sup>,

Cheng-Xia Tan<sup>1</sup>, Jian-Quan Weng<sup>1</sup>, Yu-Xin Li<sup>6</sup>, Na-Bo Sun<sup>5\*</sup>, Stephen O. Duke<sup>4\*</sup>, Xing-Hai Liu<sup>1\*</sup>

<sup>1</sup> College of Chemical Engineering, Zhejiang University of Technology, Hangzhou, 310014, Zhejiang, China; [398845586@qq.com](mailto:398845586@qq.com)(Z.W.); [751716045@qq.com](mailto:751716045@qq.com)(Q.W.);

<sup>2</sup> College of Life Science, Key Laboratory of Vector Biology and Pathogen Control of Zhejiang Province, Huzhou University, Huzhou, 313000, Zhejiang, China, [178341894@qq.com](mailto:178341894@qq.com)(L.J. )

<sup>3</sup> Natural Products Utilization Research Unit, Agricultural Research Service, U.S. Department of Agriculture, P.O. Box 1848, University, Mississippi 38677, USA, [charles.cantrell@usda.gov](mailto:charles.cantrell@usda.gov)(C.L.); [joanna.bajsa-hirsche@usda.gov](mailto:joanna.bajsa-hirsche@usda.gov)(J.B.)

<sup>4</sup> National Center for Natural Product Research, School of Pharmacy, University of Mississippi, P.O. Box 1848, University, Mississippi, 38677, USA, [sduke@olemiss.edu](mailto:sduke@olemiss.edu)(S.D.)

<sup>5</sup> College of Biology and Environmental Engineering, Zhejiang Shuren University, Hangzhou 310015, Zhejiang, China, [nabosun@126.com](mailto:nabosun@126.com)(N.B.)

<sup>6</sup> State Key Laboratory of Elemento-Organic Chemistry, Department of Chemistry, Nankai University, Tianjin, China, Key Laboratory of Study and Discovery of Small Targeted Molecules of Hunan Province, Hunan Normal University, Changsha, Hunan, China, [liyxl28@nankai.edu.cn](mailto:liyxl28@nankai.edu.cn)(Y.X.)

### Table of contents

|                                              |      |
|----------------------------------------------|------|
| 1. The spectroscopy of target compounds..... | 2-10 |
|----------------------------------------------|------|

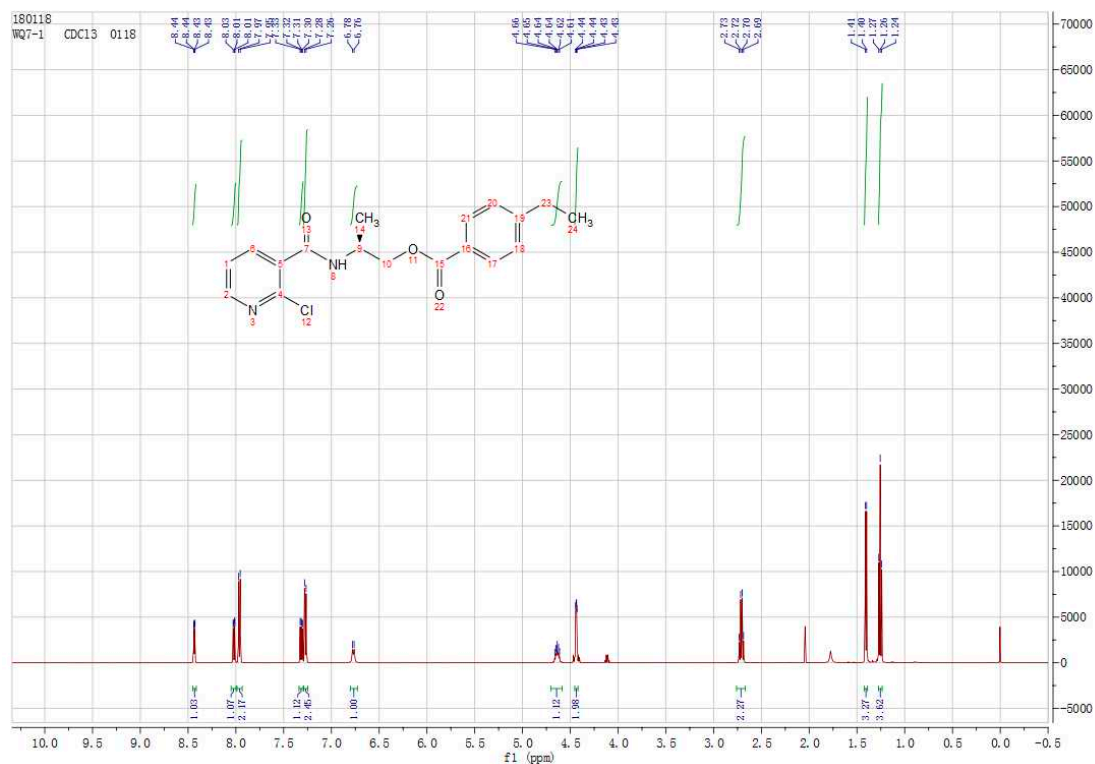

<sup>1</sup>H NMR of compound 3a

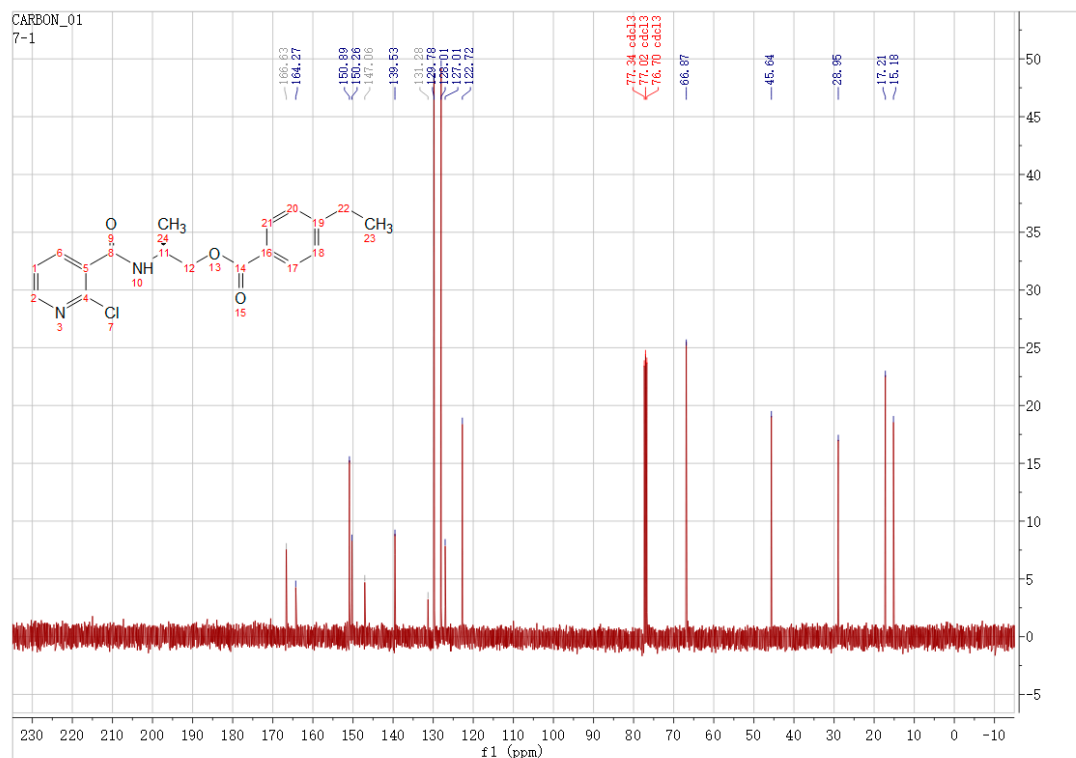

<sup>13</sup>C NMR of compound 3a

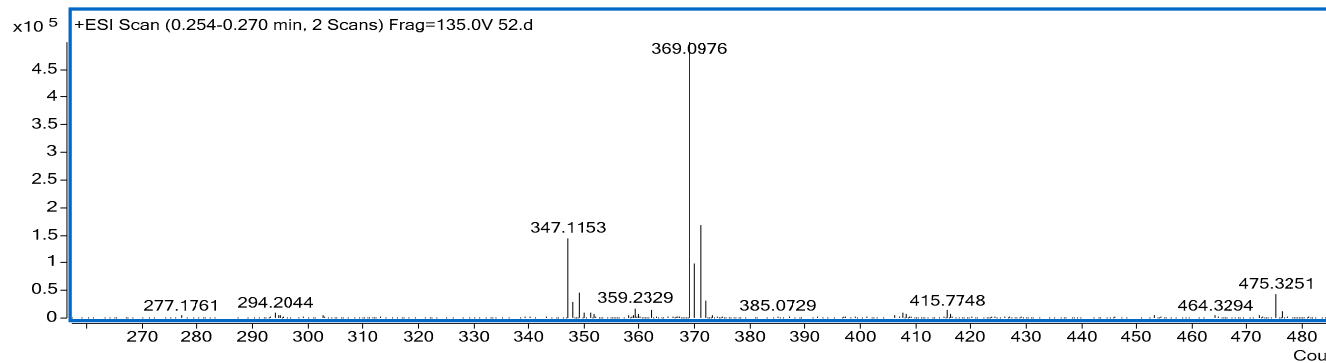

HRMS of compound 3a

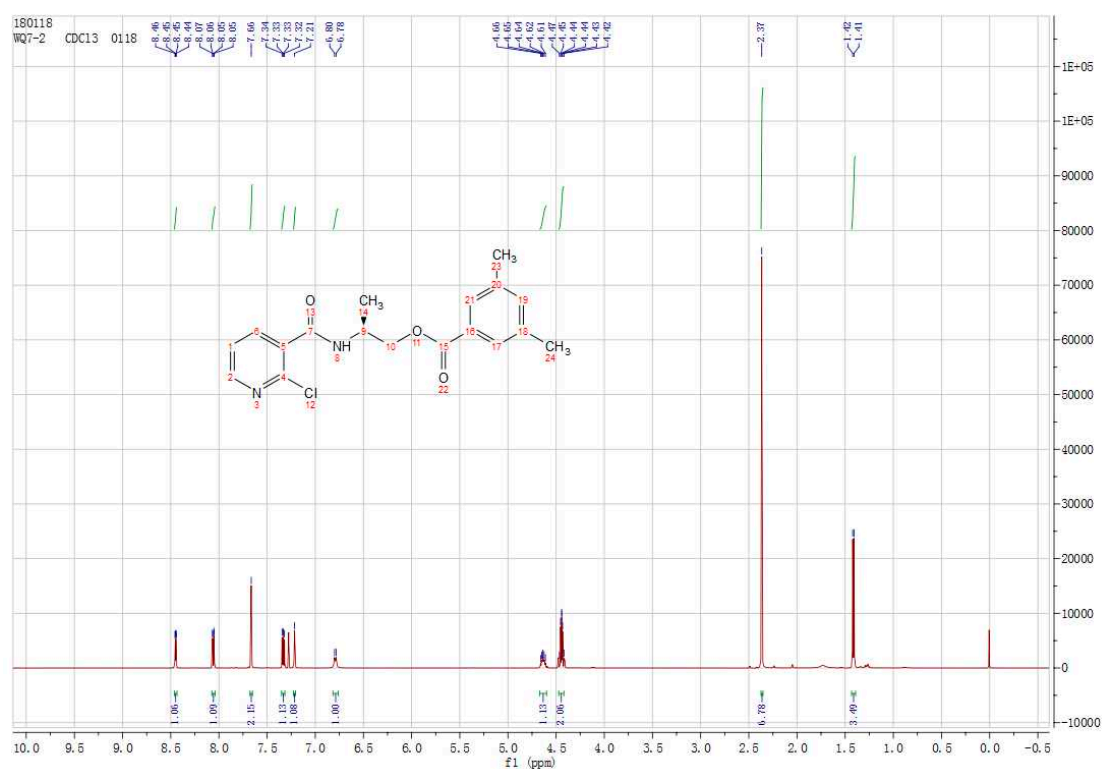

<sup>1</sup>H NMR of compound 3b

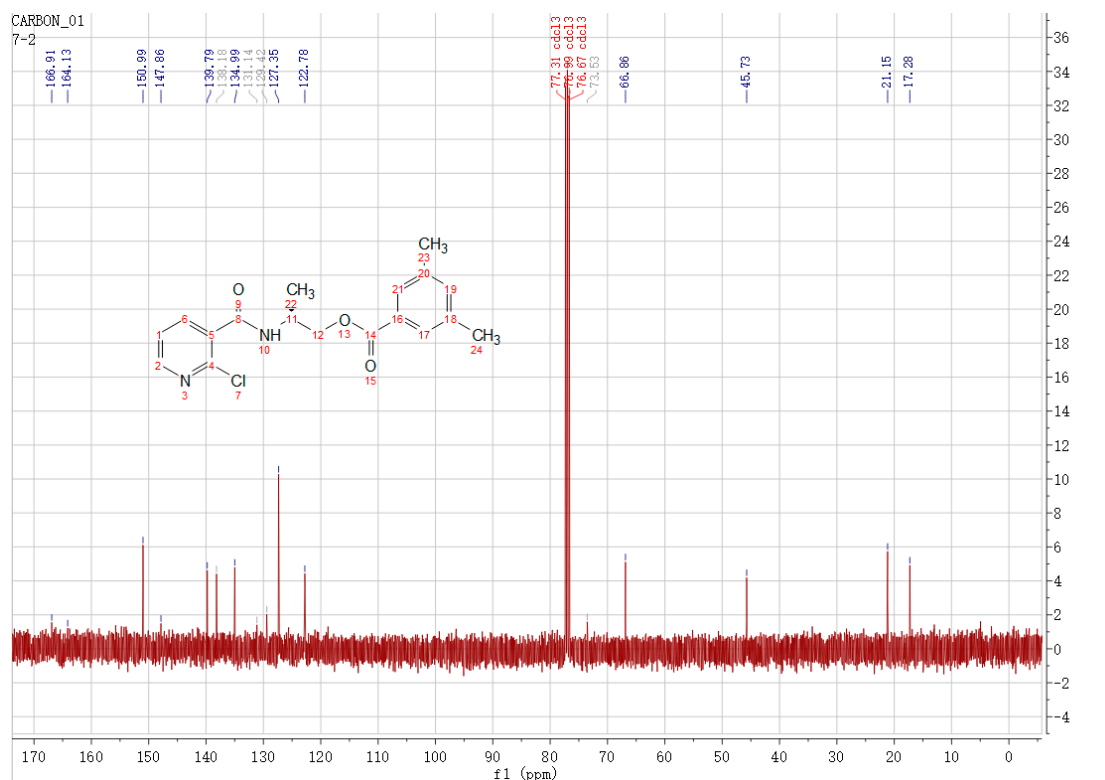

$^{13}\text{C}$  NMR of compound 3b

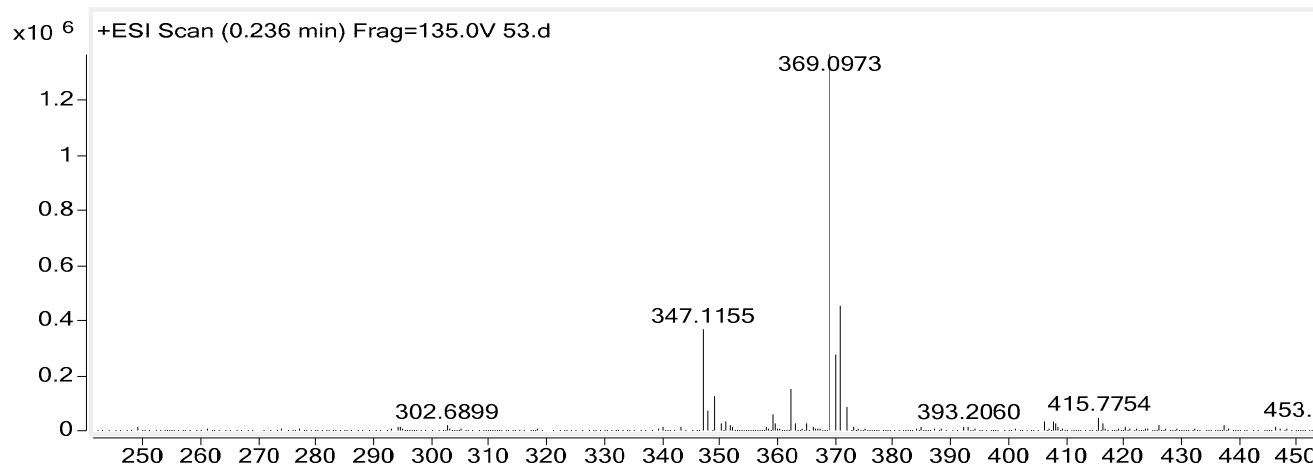

HRMS of compound 3b

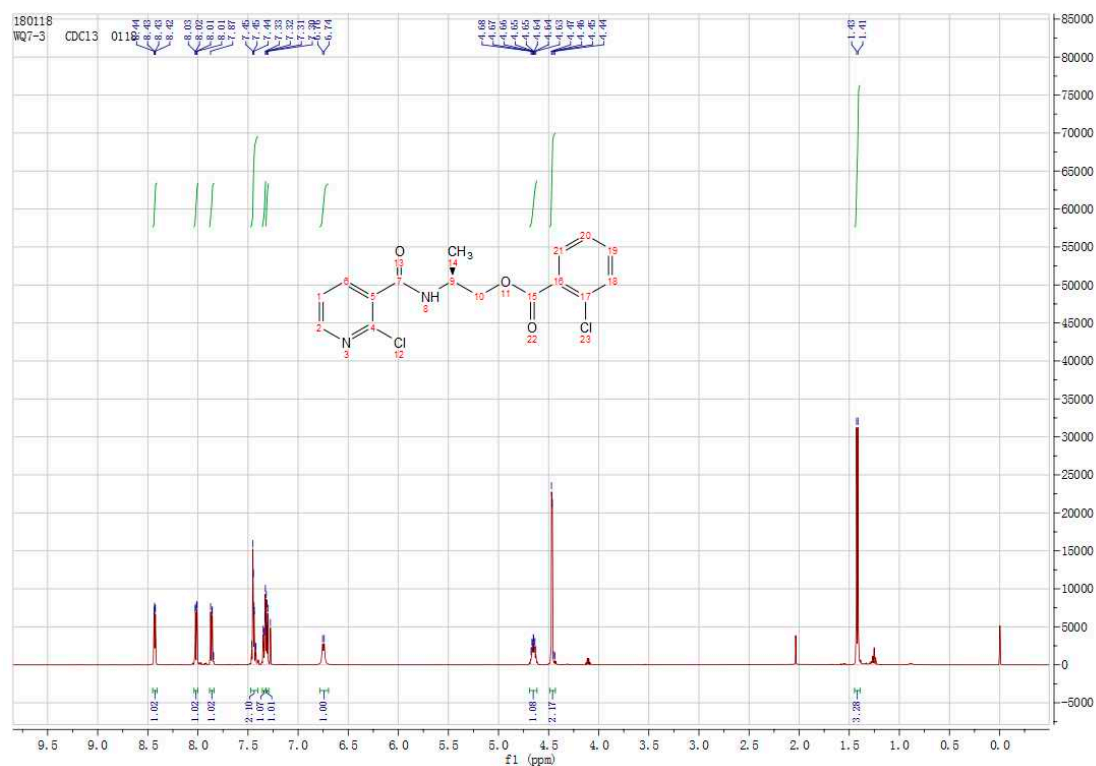

<sup>1</sup>H NMR of compound 3c

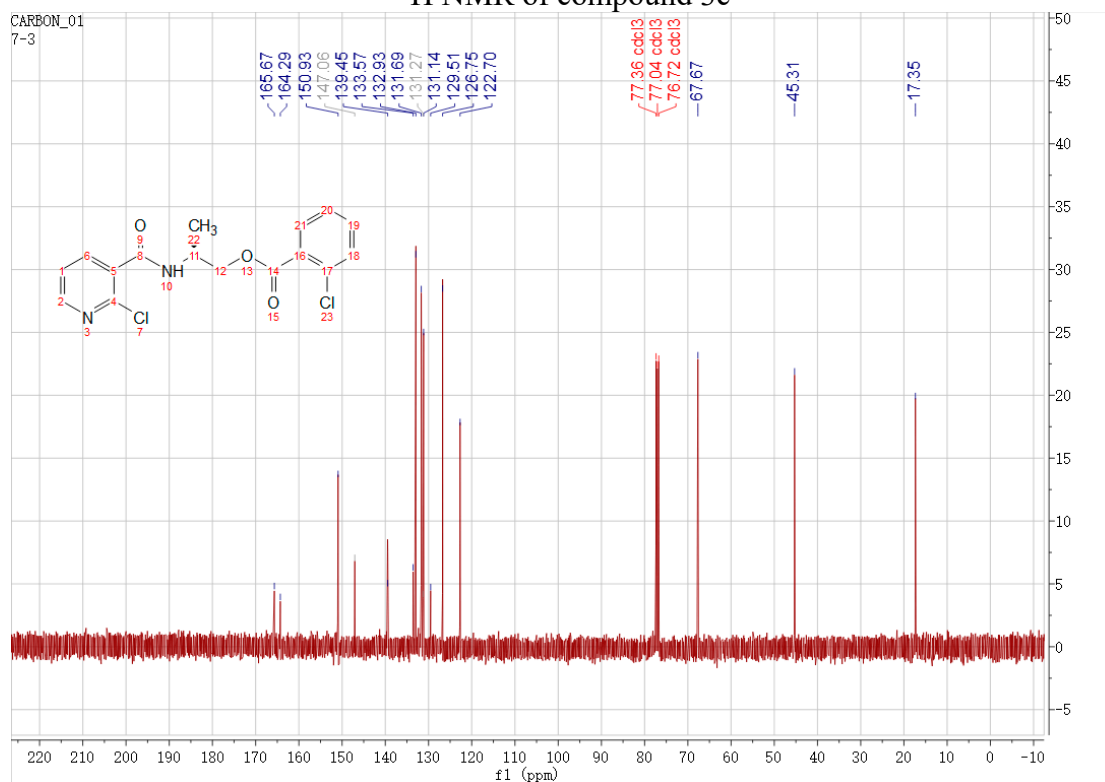

<sup>13</sup>C NMR of compound 3c

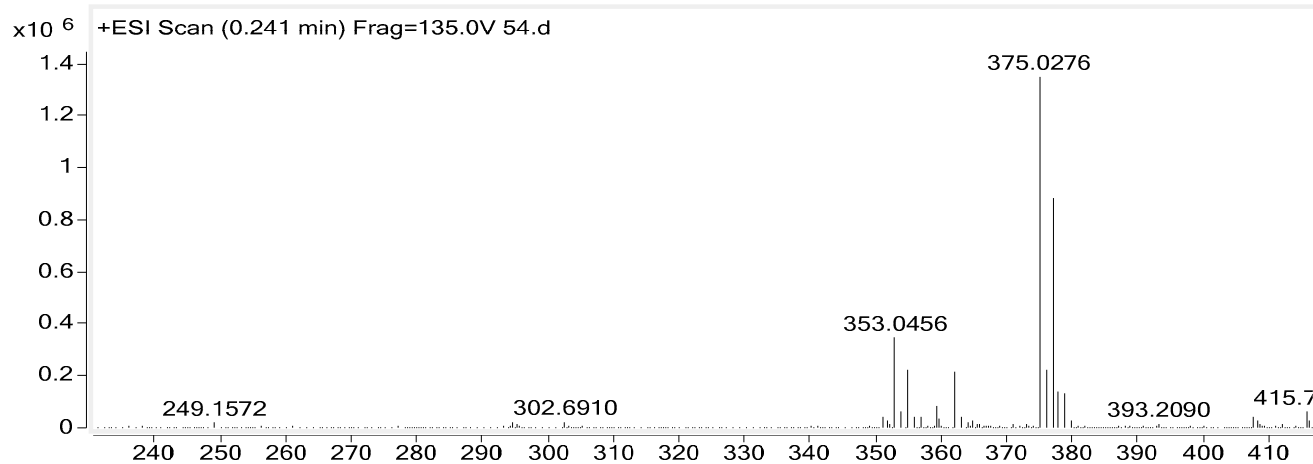

HRMS of compound 3c

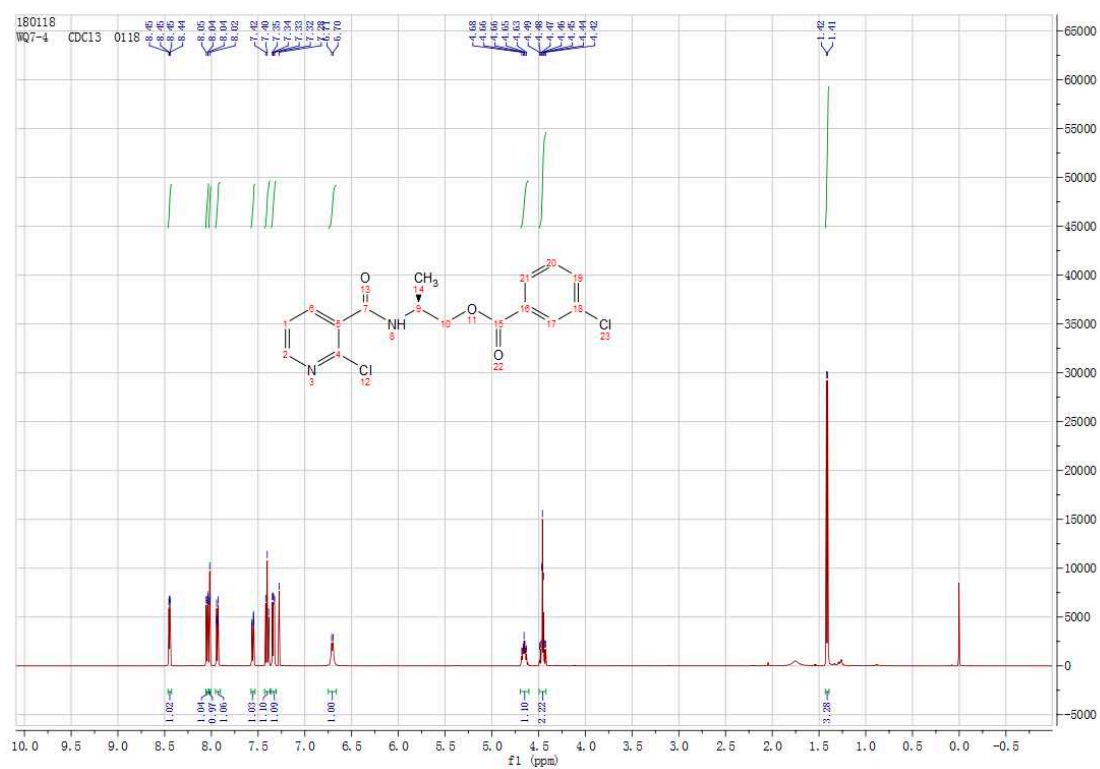

<sup>1</sup>H NMR of compound 3d

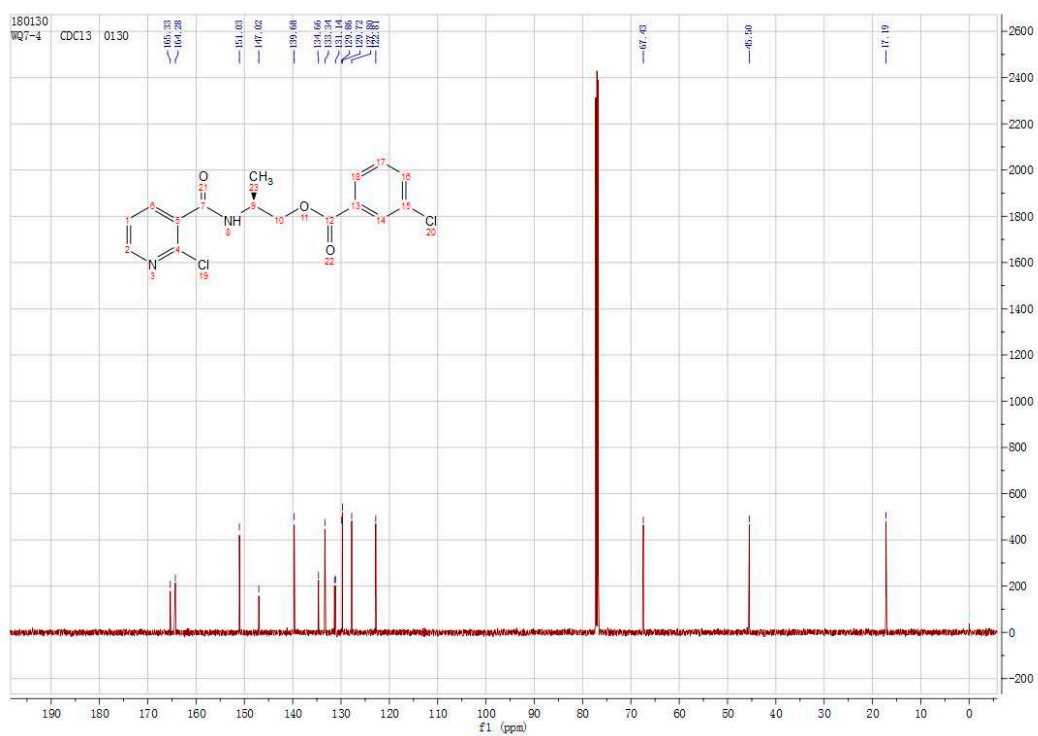

$^{13}\text{C}$  NMR of compound 3d

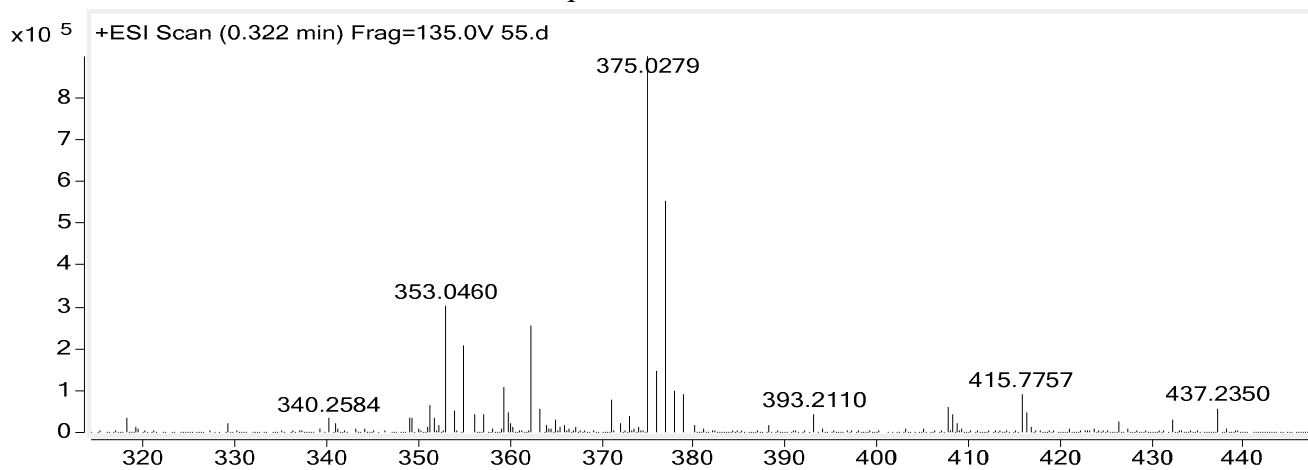

HRMS of compound 3d

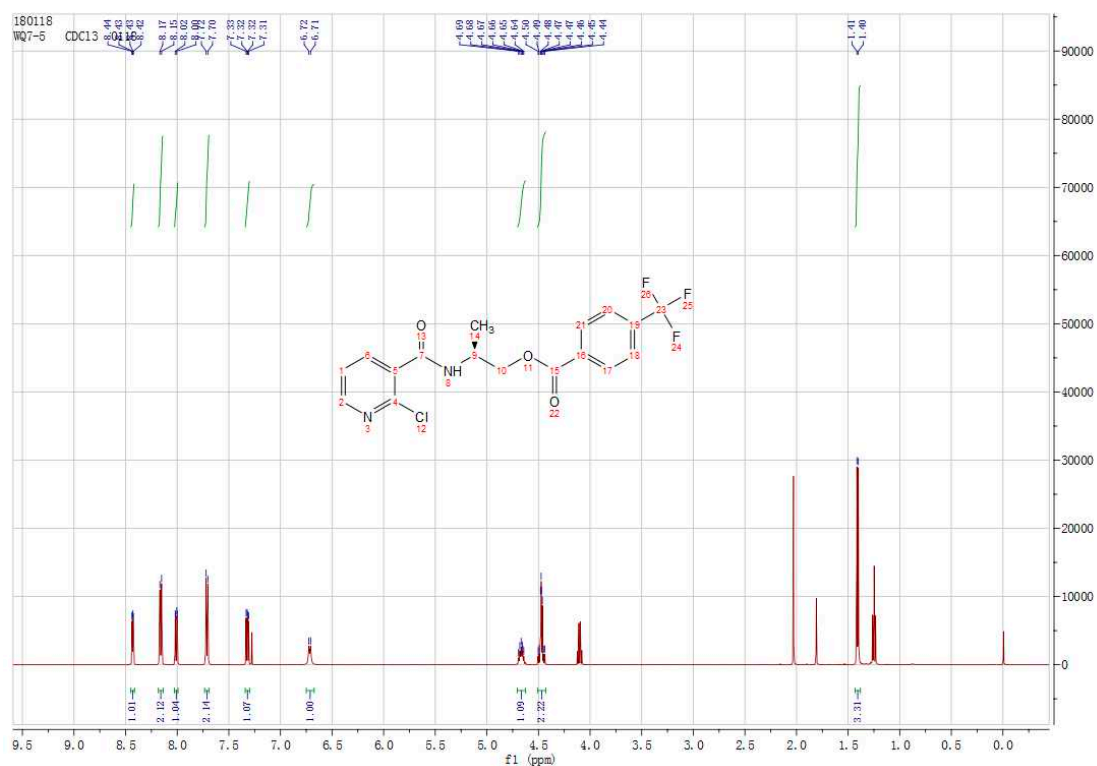

<sup>1</sup>H NMR of compound 3e

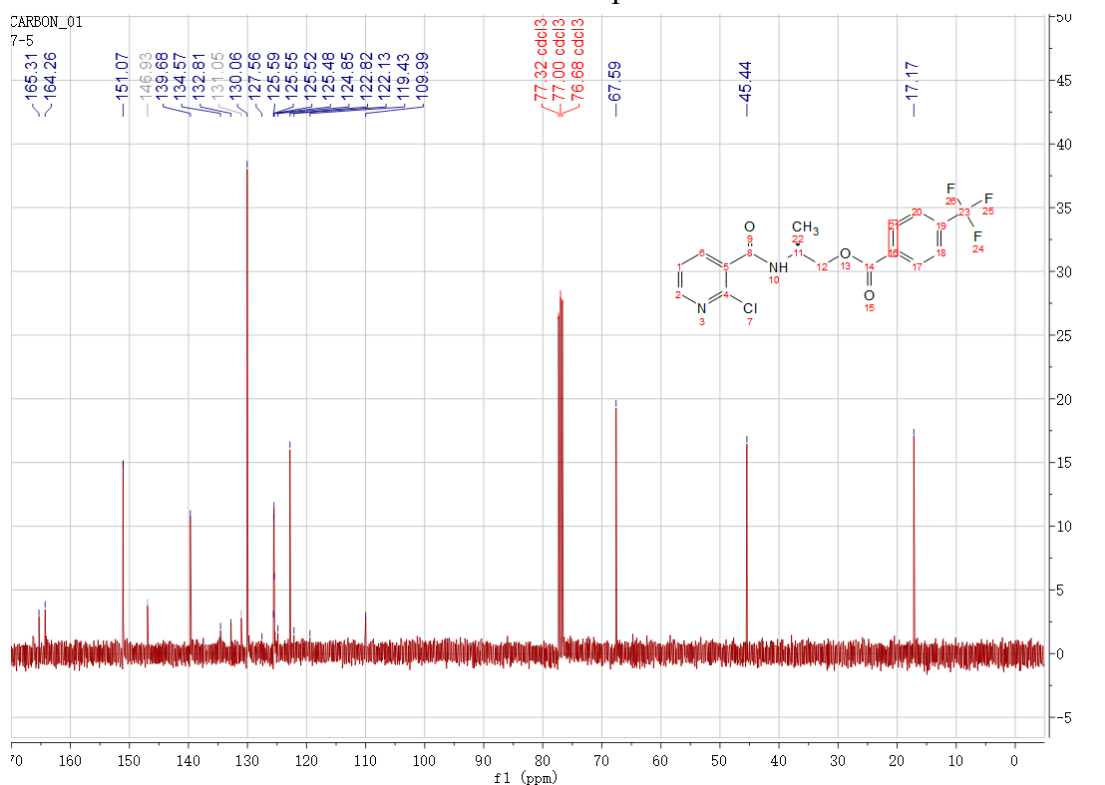

<sup>13</sup>C NMR of compound 3e



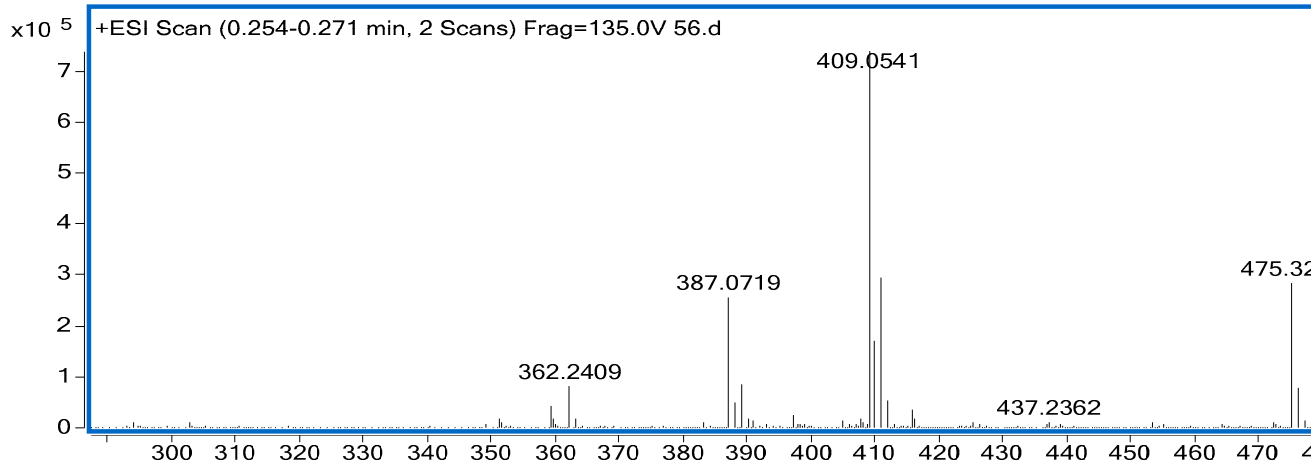

HRMS of compound 3e

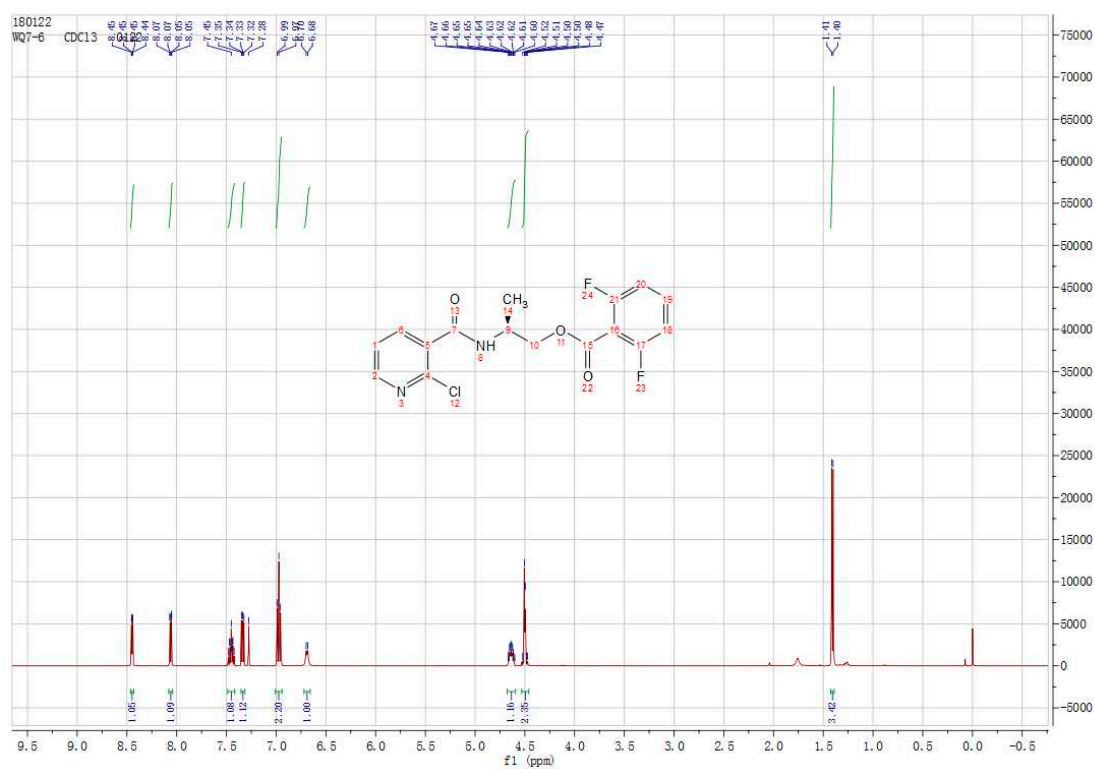

<sup>1</sup>H NMR of compound 3f

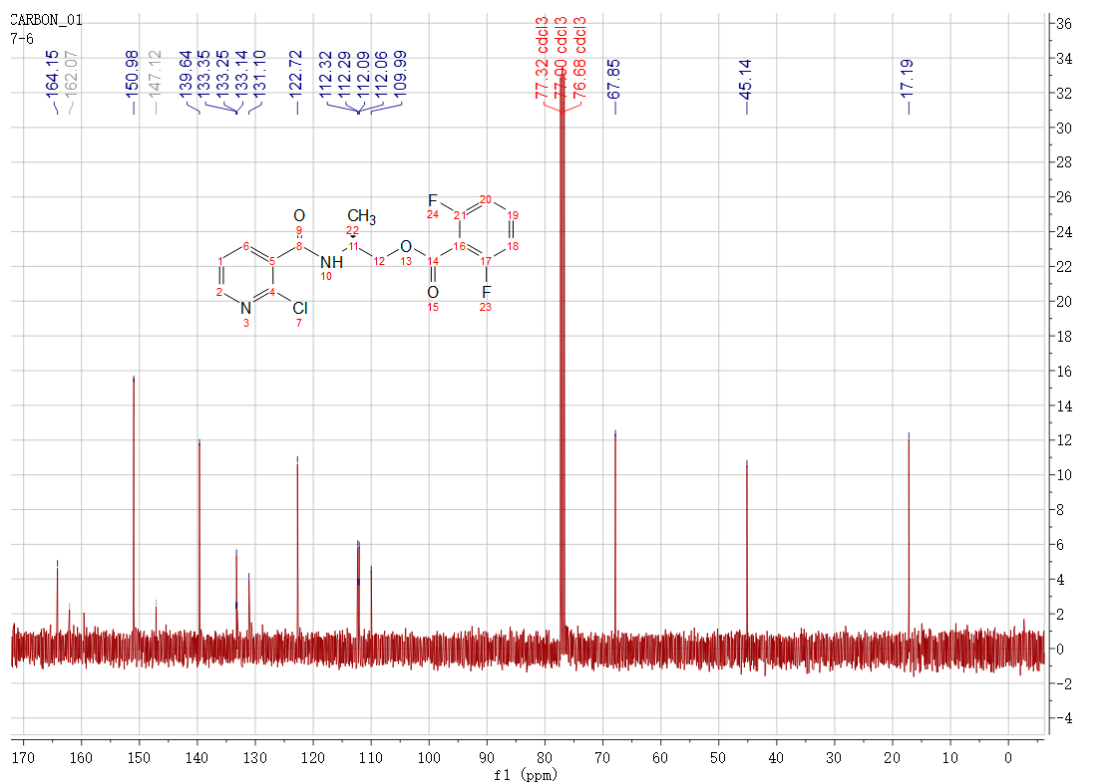

$^{13}\text{C}$  NMR of compound 3f

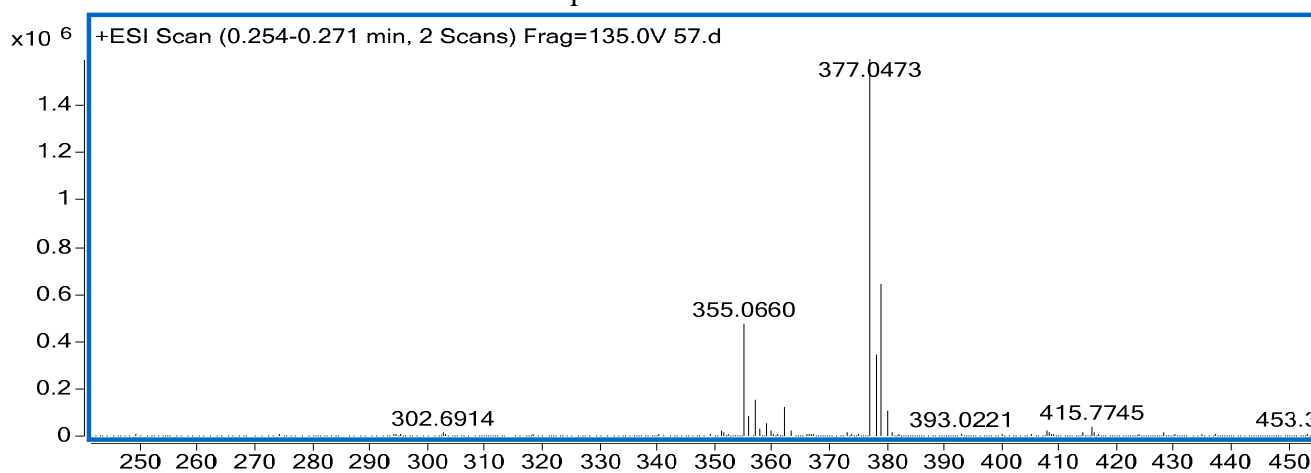

HRMS of compound 3f

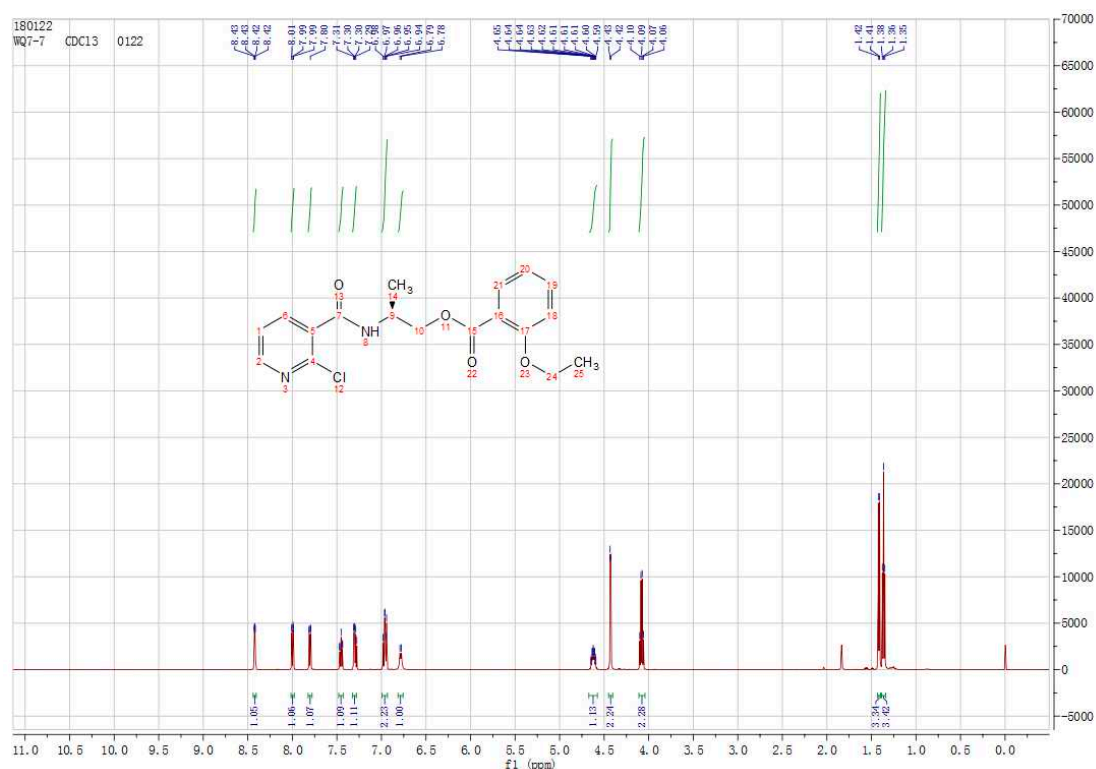

<sup>1</sup>H NMR of compound 3g

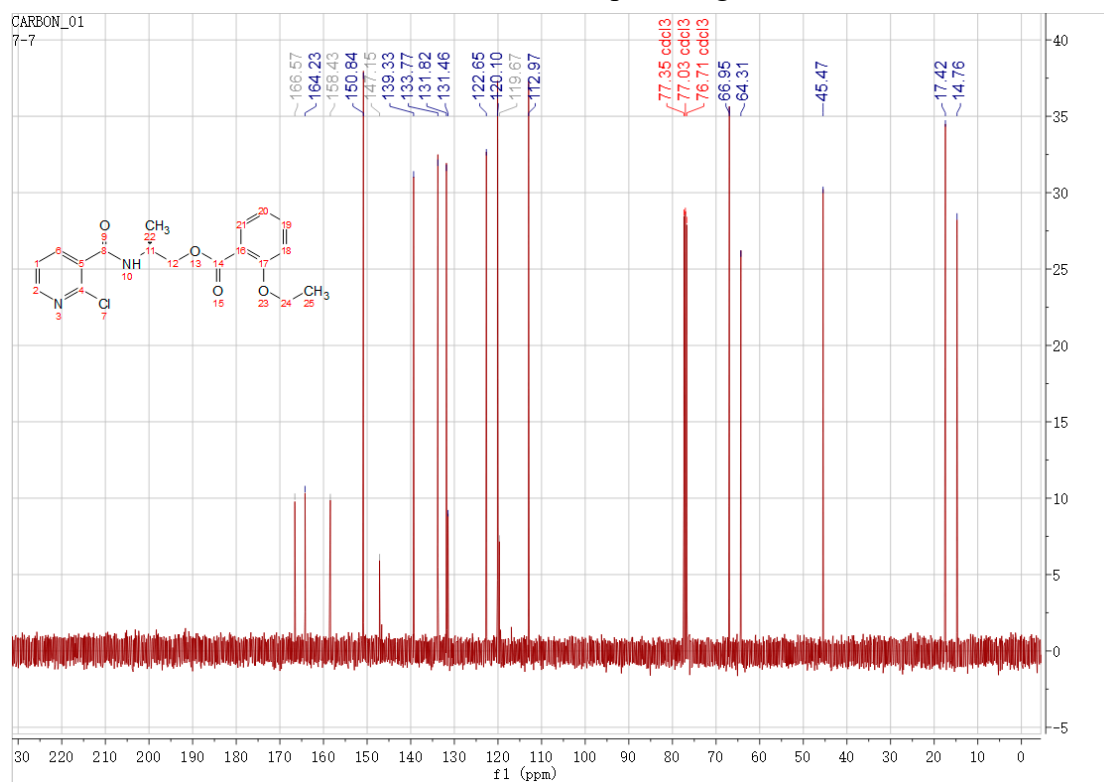

<sup>13</sup>C NMR of compound 3g

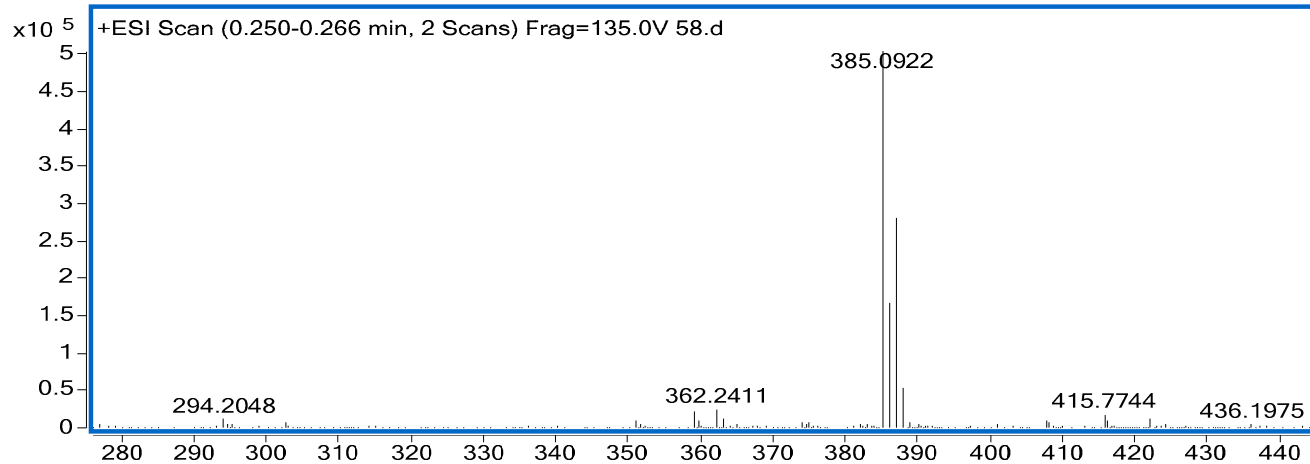

HRMS of compound 3g

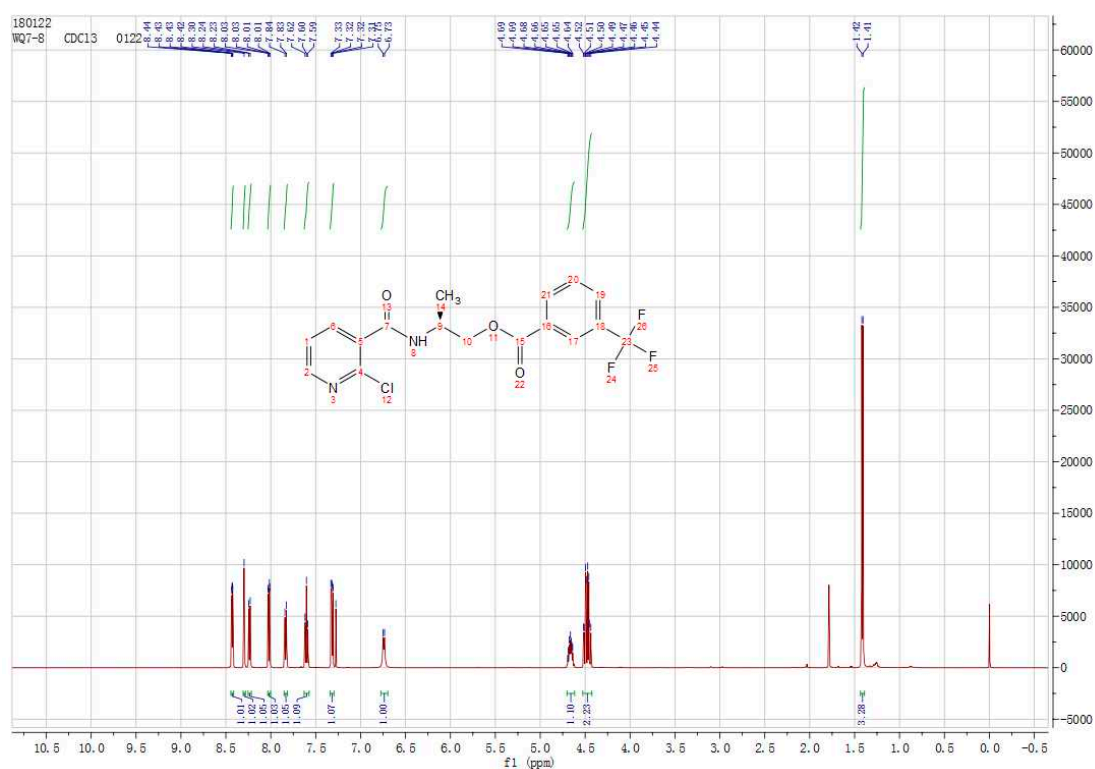

<sup>1</sup>H NMR of compound 3h

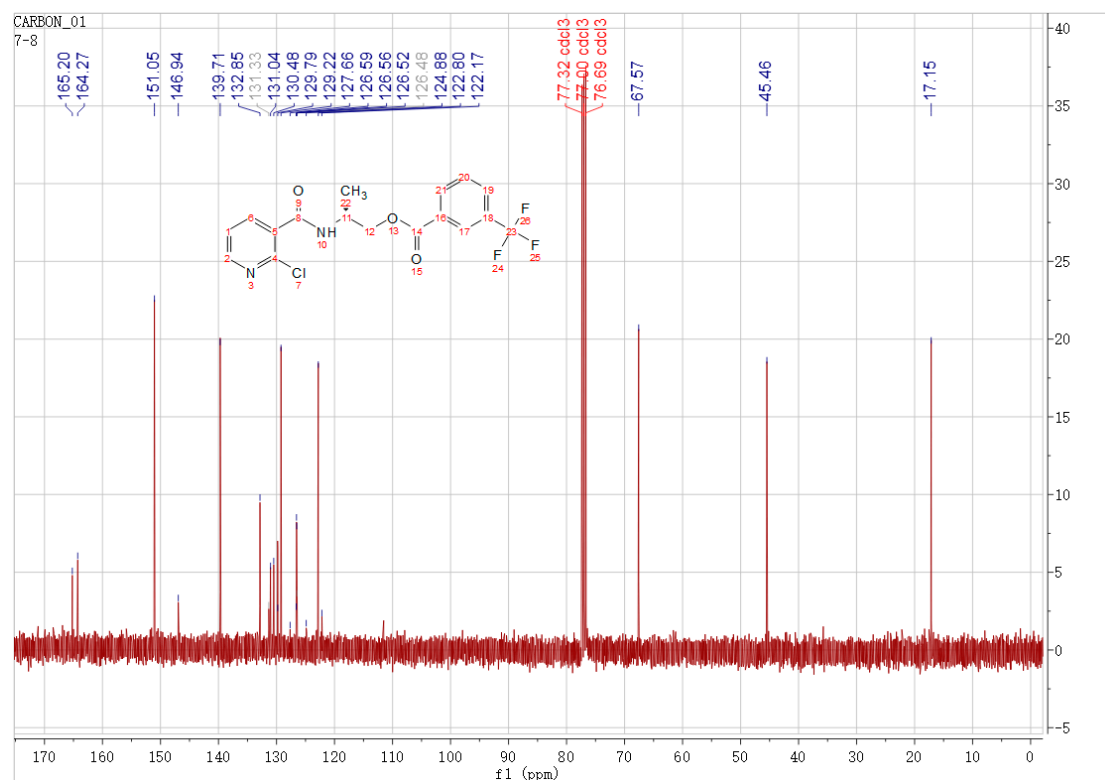

$^{13}\text{C}$  NMR of compound 3h

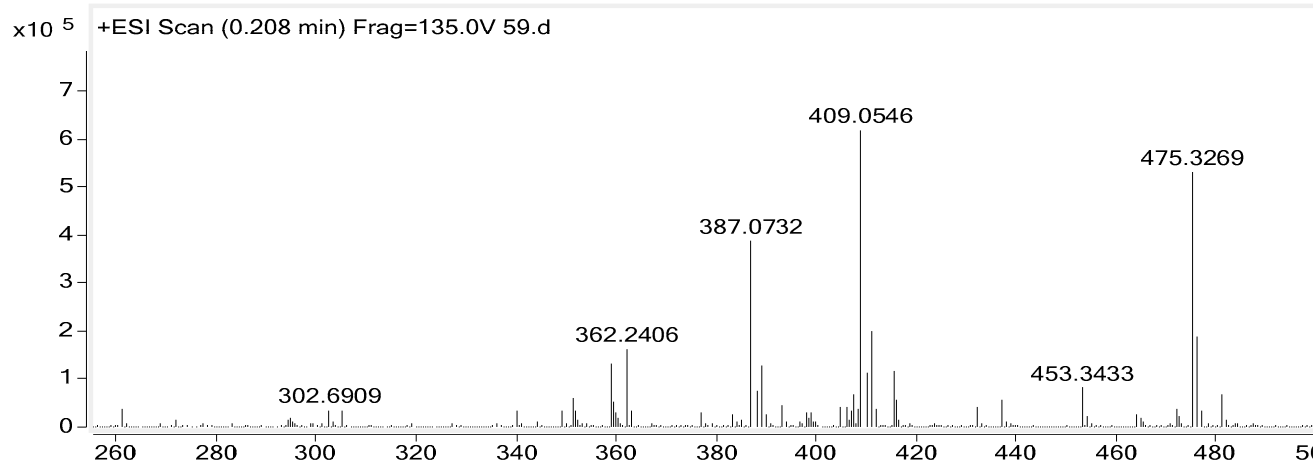

HRMS of compound 3h

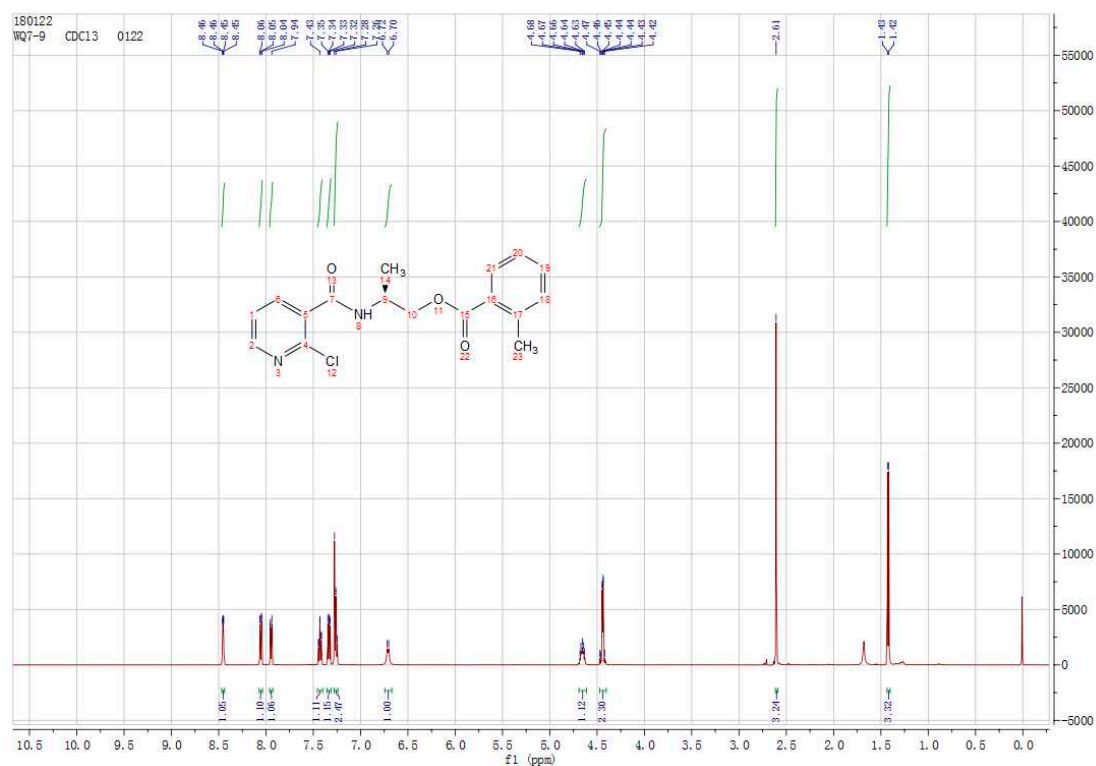

<sup>1</sup>H NMR of compound 3i

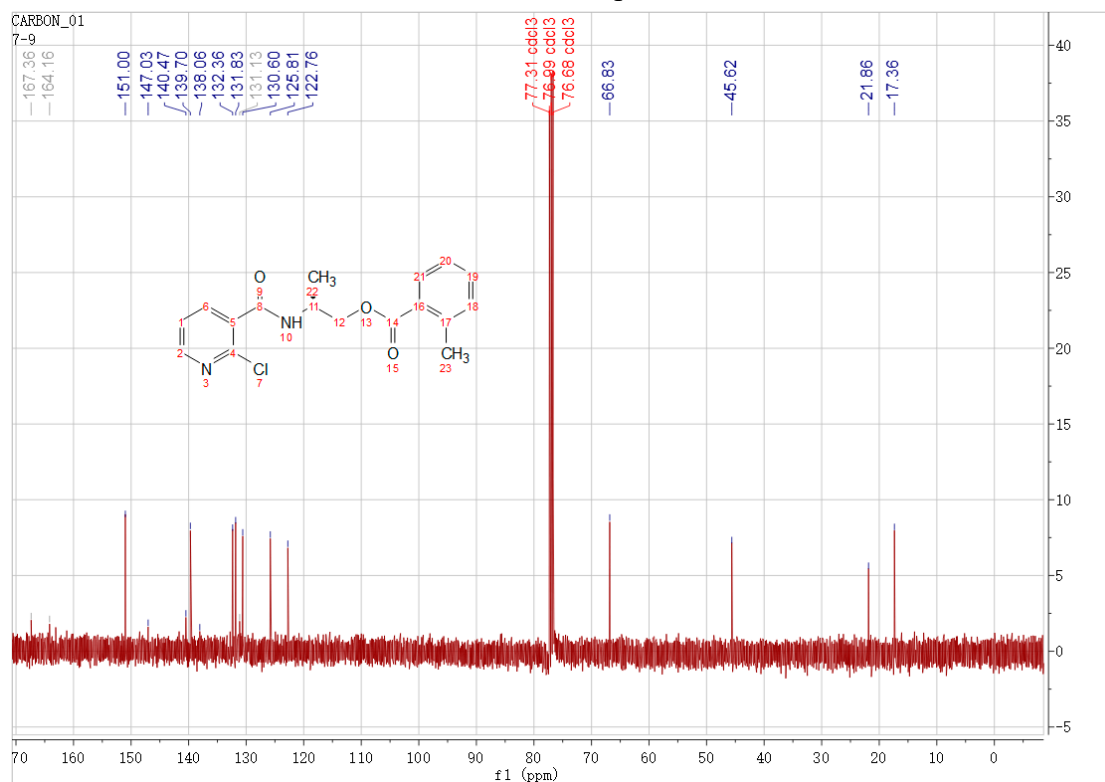

<sup>13</sup>C NMR of compound 3i

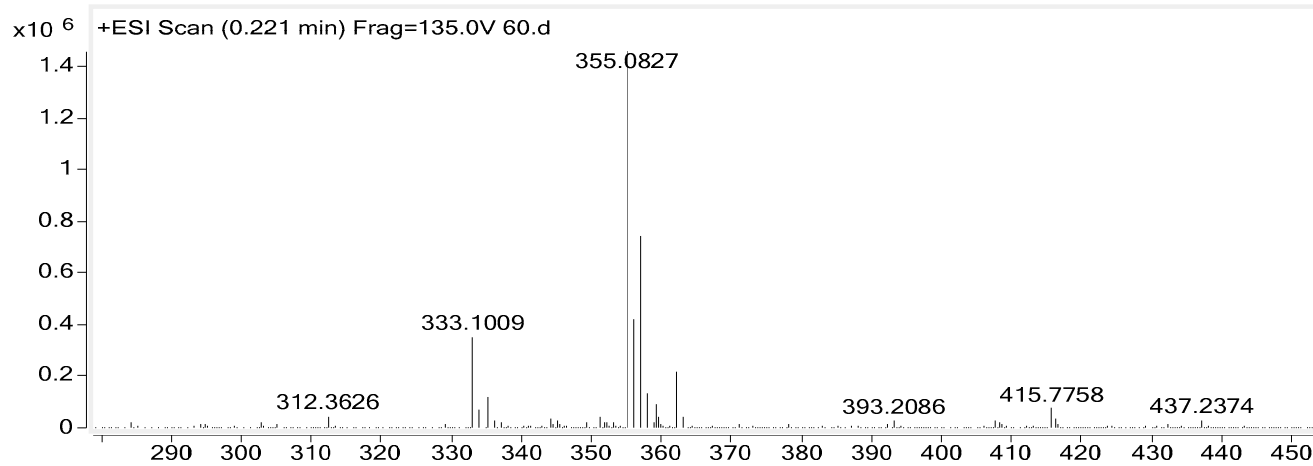

HRMS of compound 3i

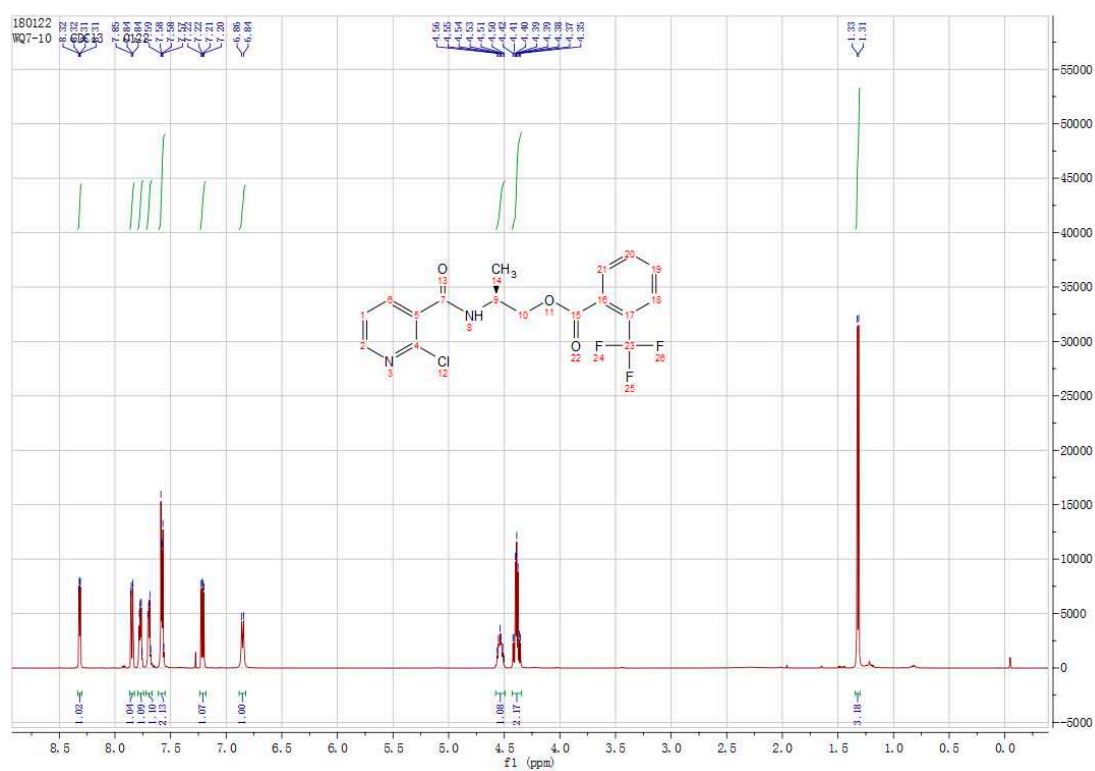

<sup>1</sup>H NMR of compound 3j

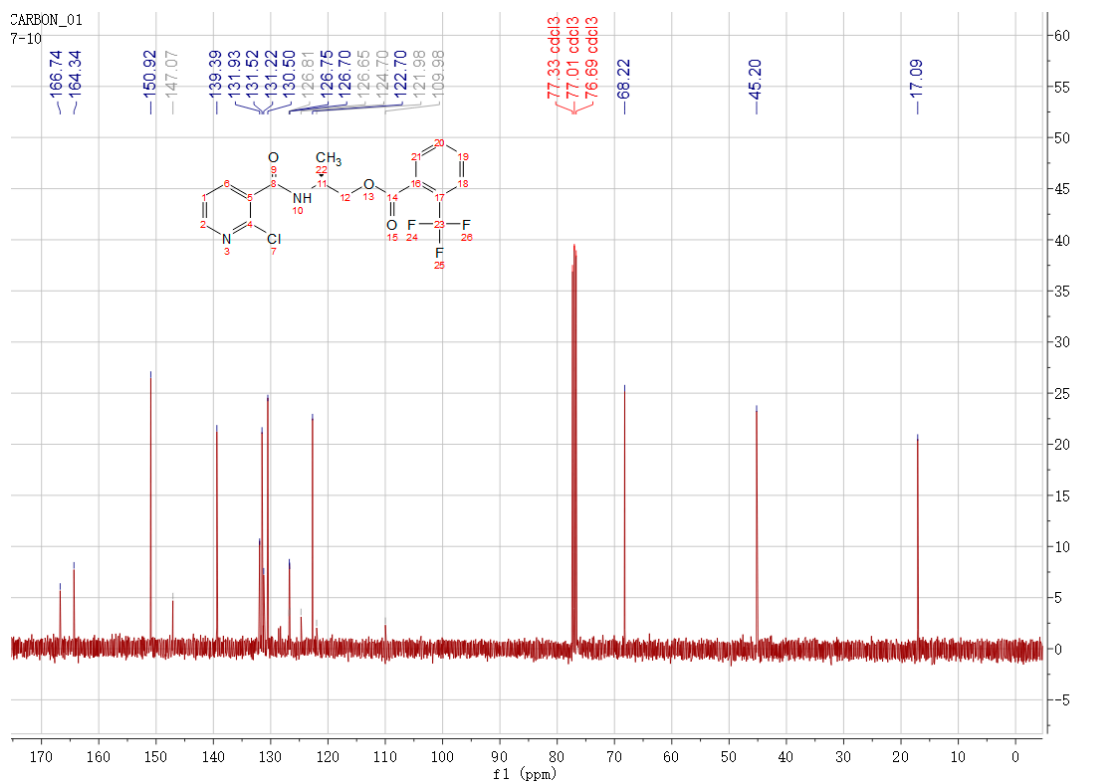

$^{13}\text{C}$  NMR of compound 3j

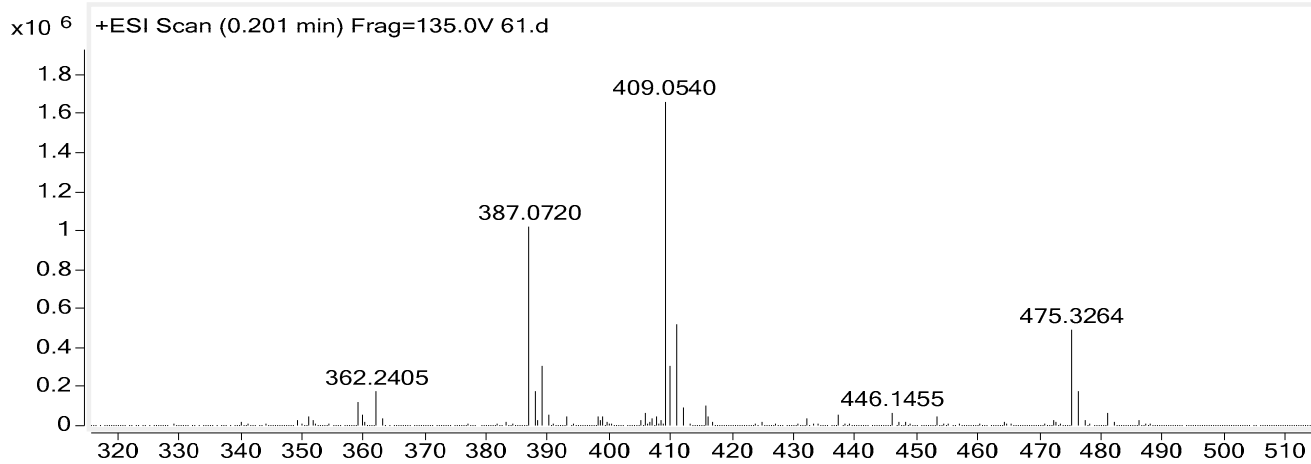

HRMS of compound 3j



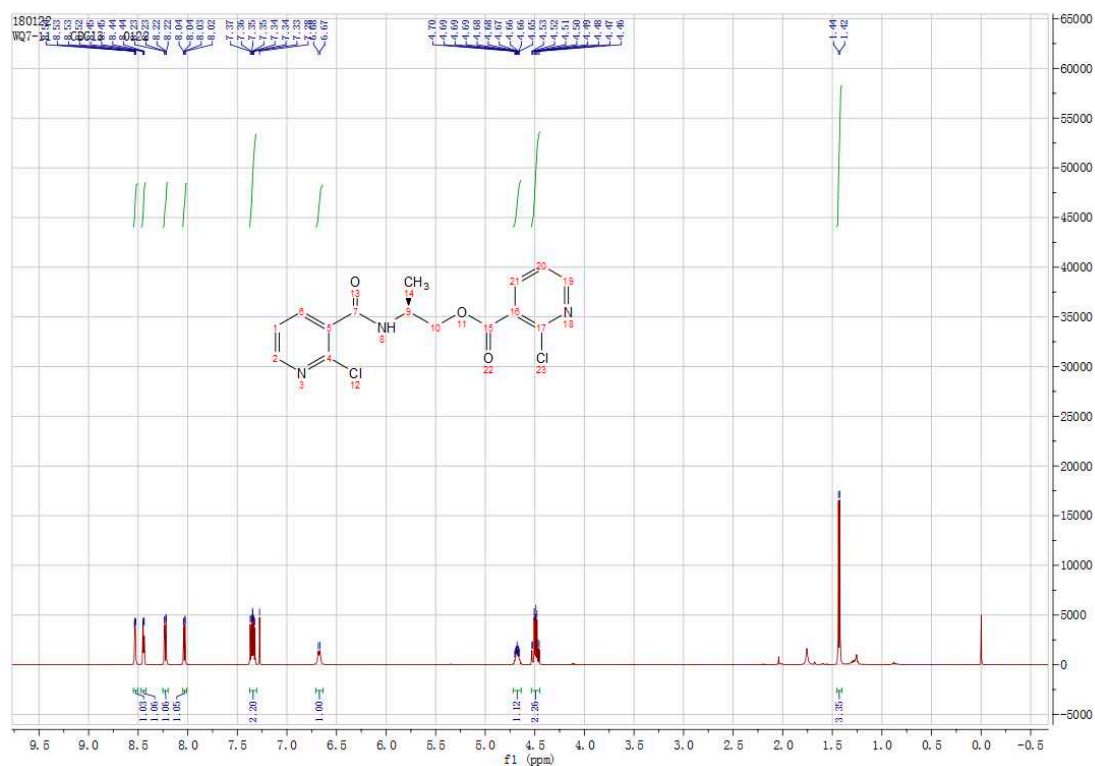<sup>1</sup>H NMR of compound 3k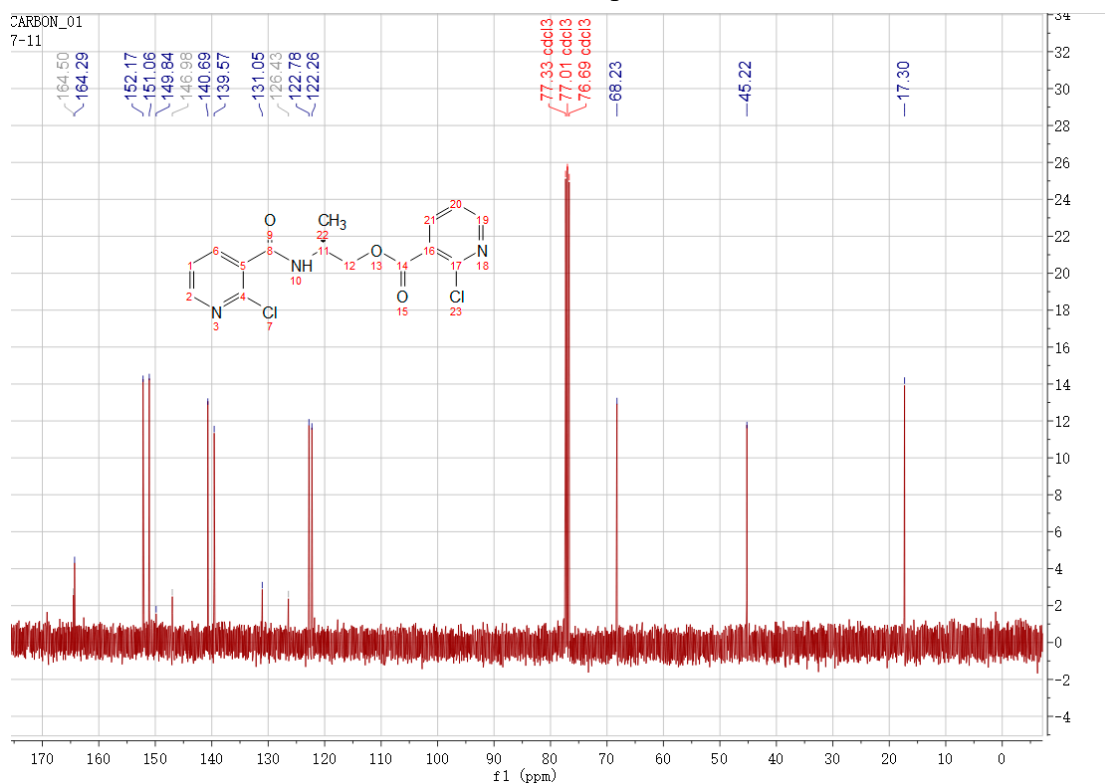<sup>13</sup>C NMR of compound 3k

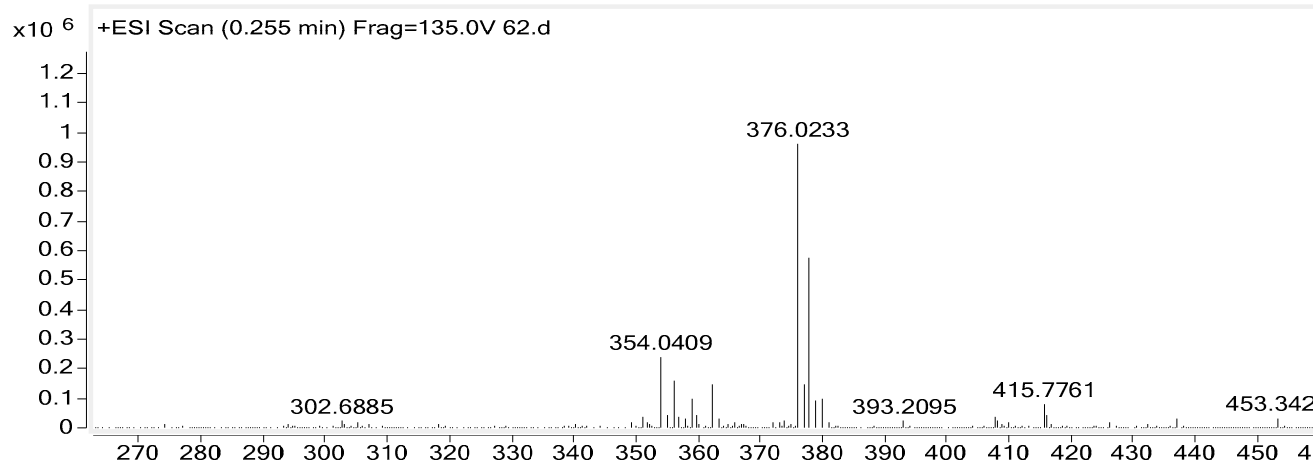

HRMS of compound 3k

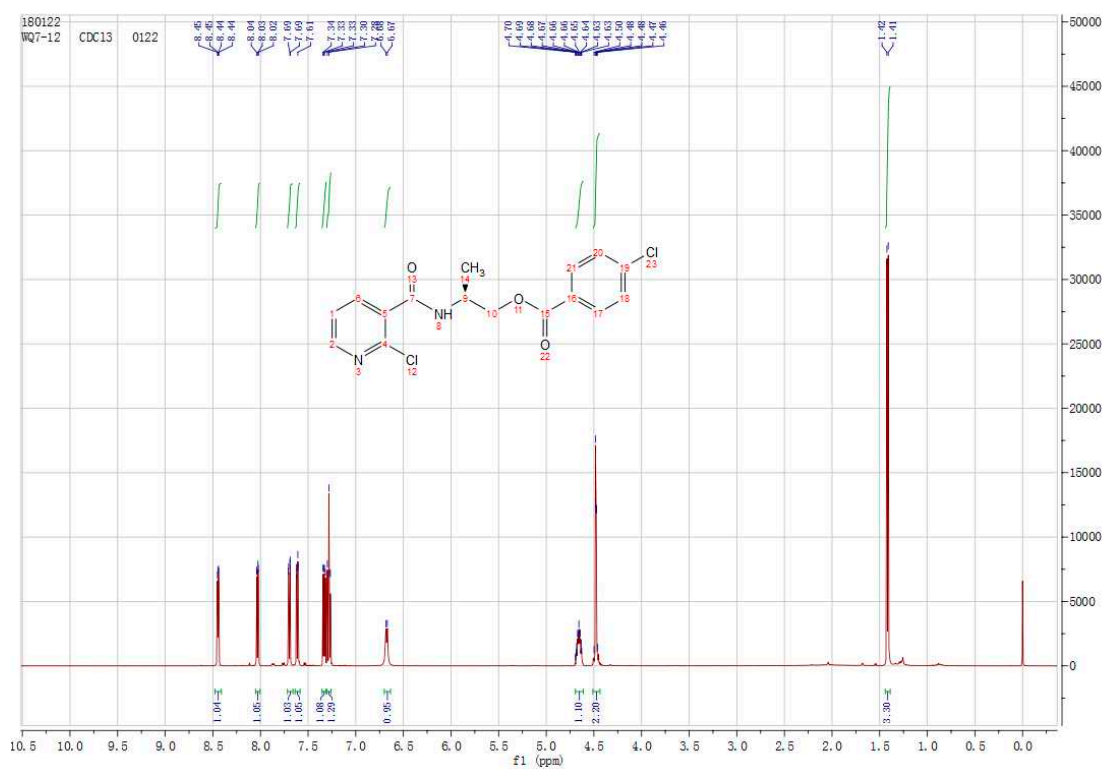

<sup>1</sup>H NMR of compound 3l

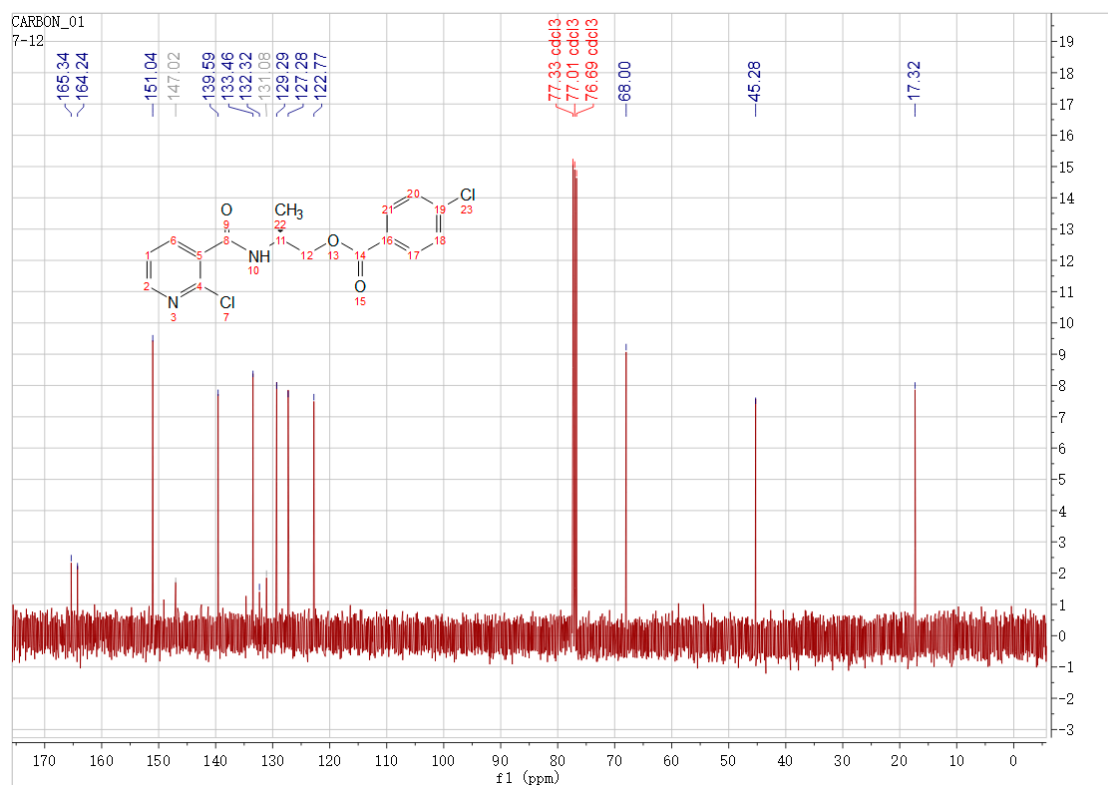

$^{13}\text{C}$  NMR of compound 31

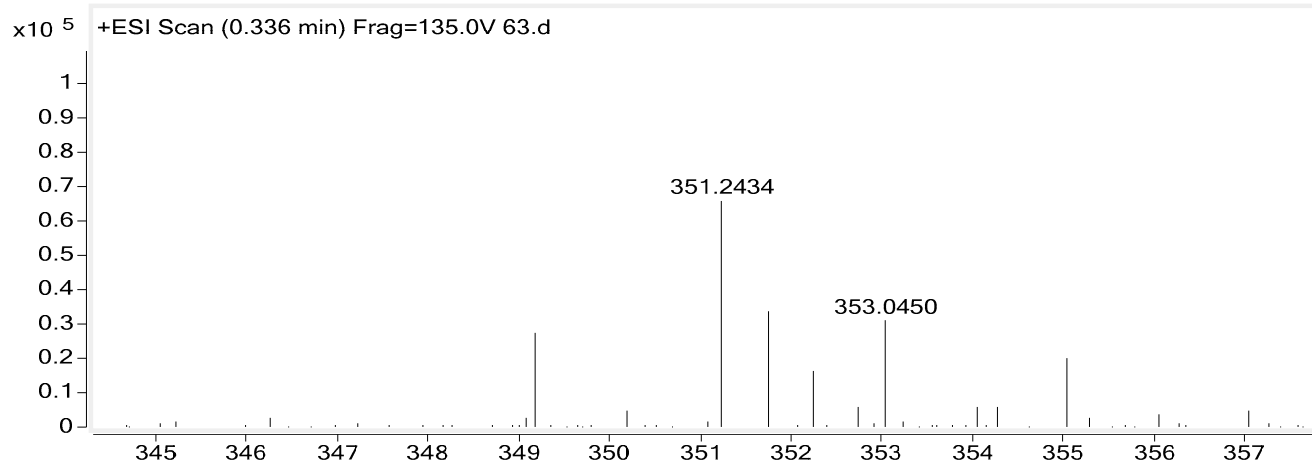

HRMS of compound 31

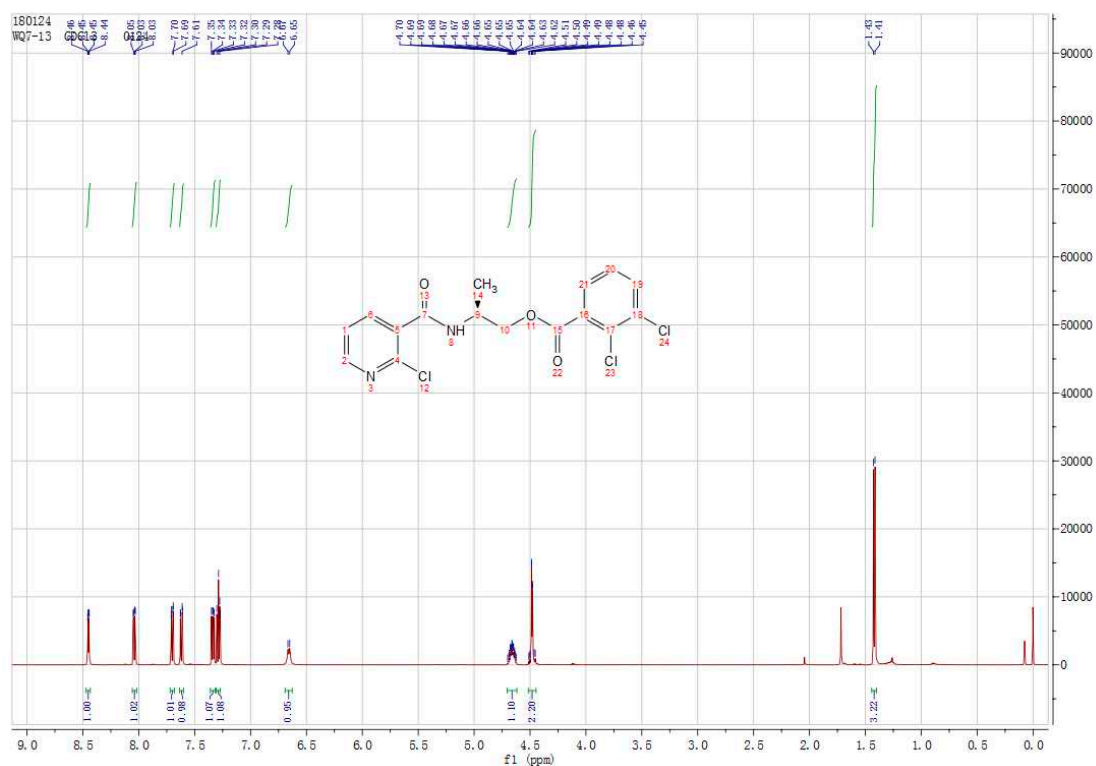<sup>1</sup>H NMR of compound 3m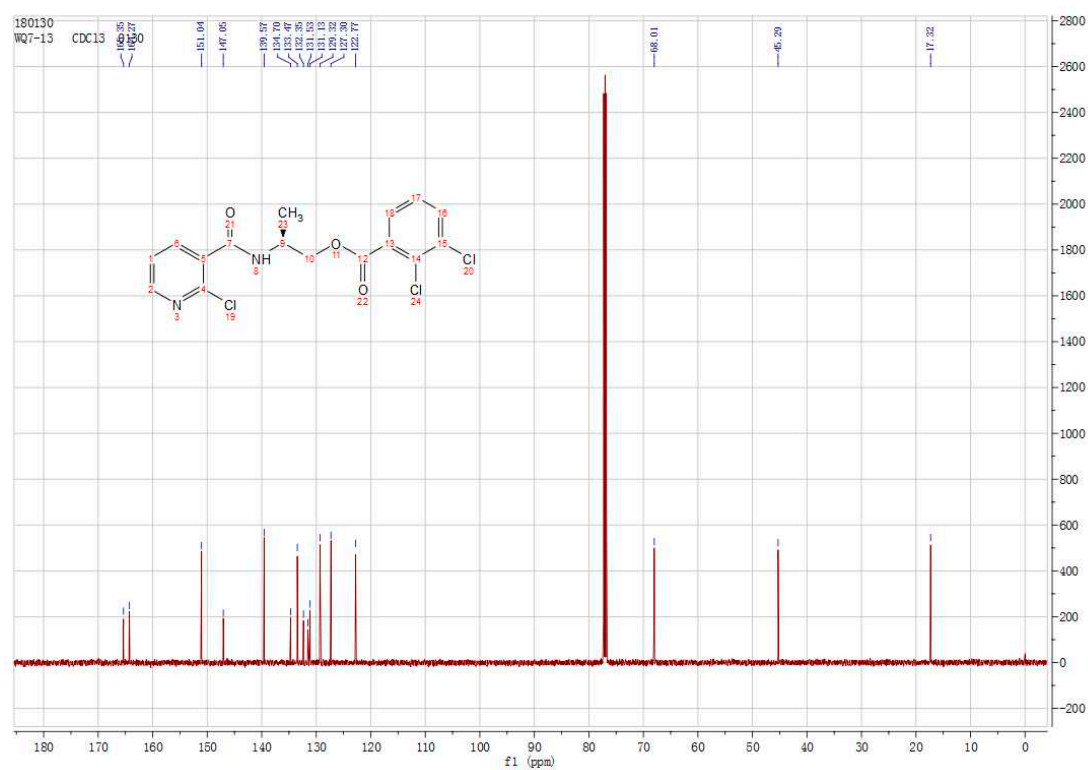 $^{13}\text{C}$  NMR of compound 3m

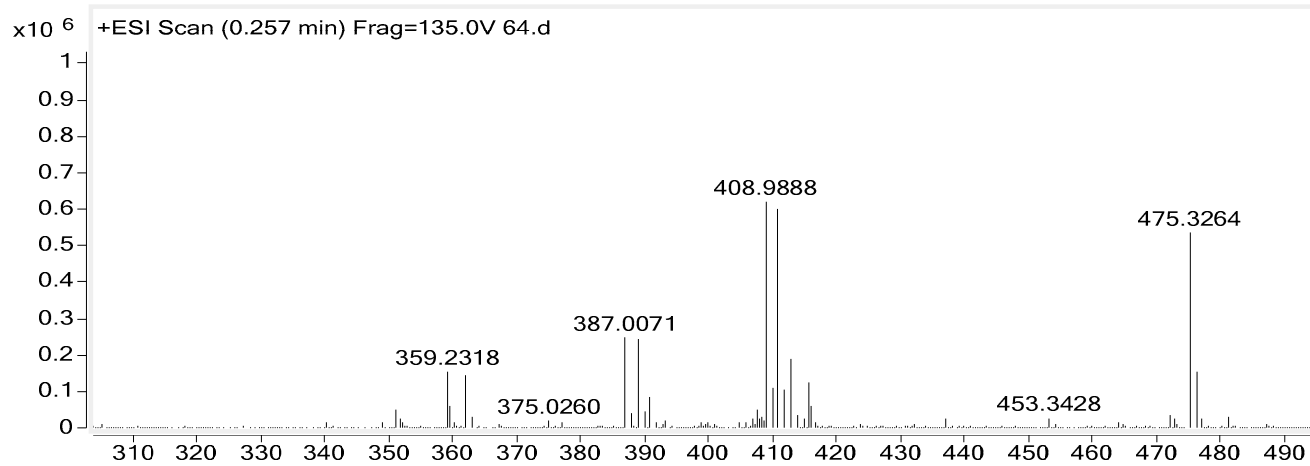

HRMS of compound 3m

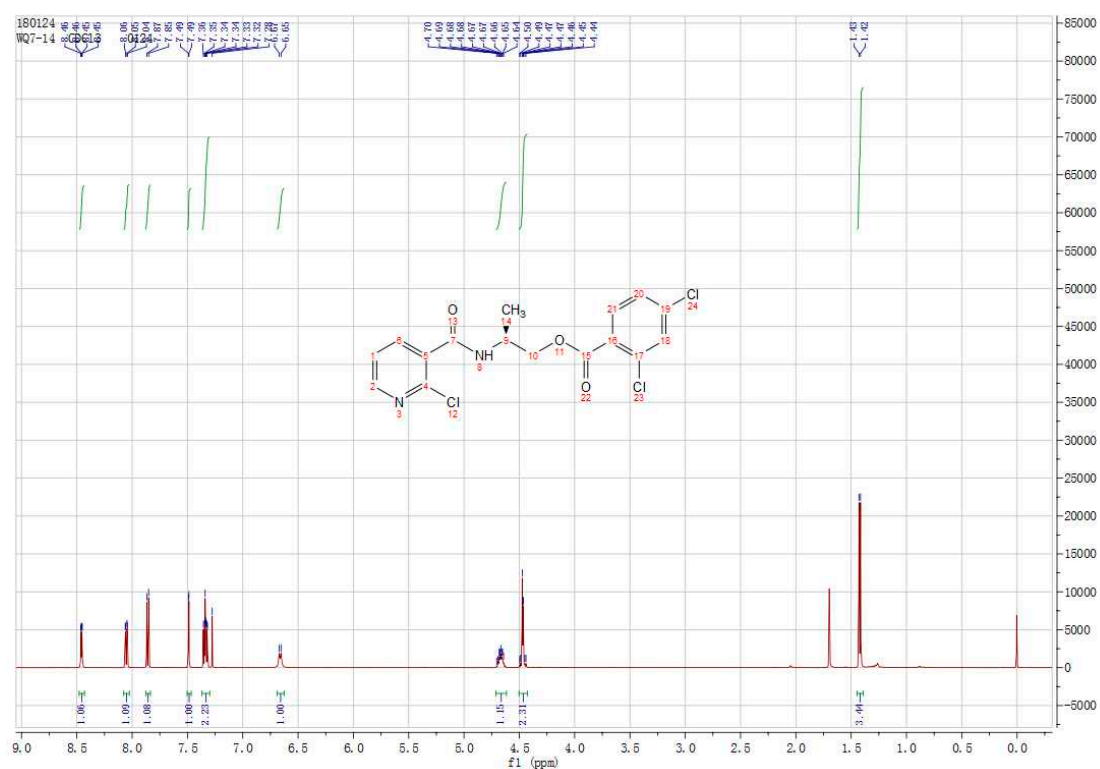

<sup>1</sup>H NMR of compound 3n

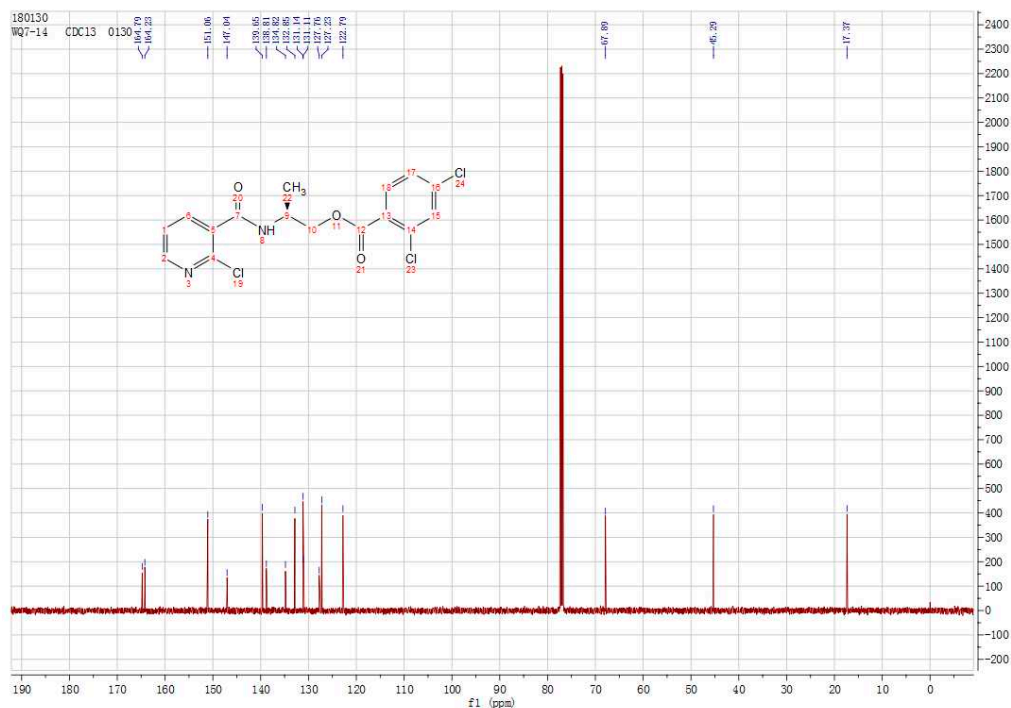

$^{13}\text{C}$  NMR of compound 3n

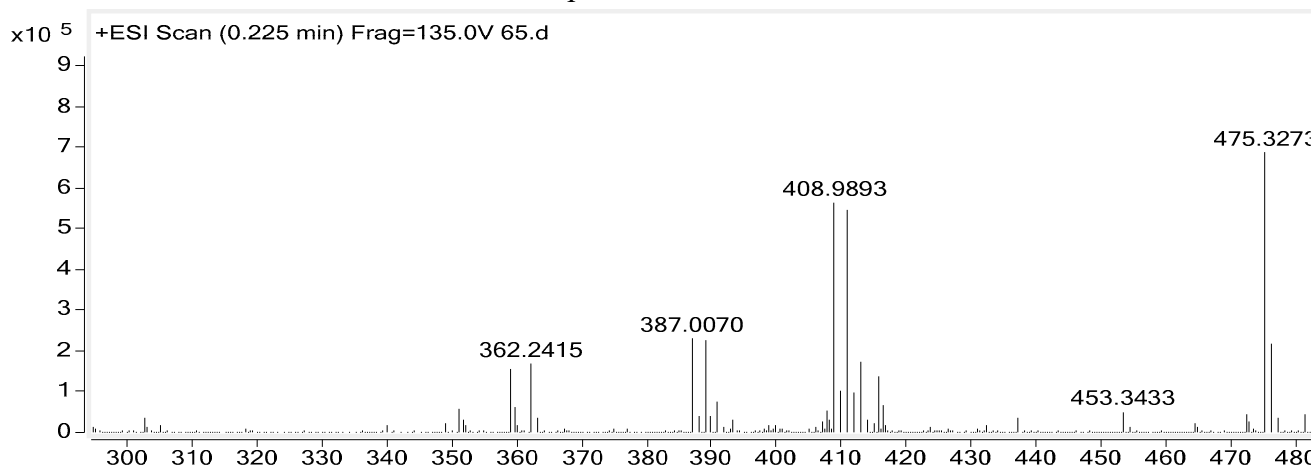

HRMS of compound 3n

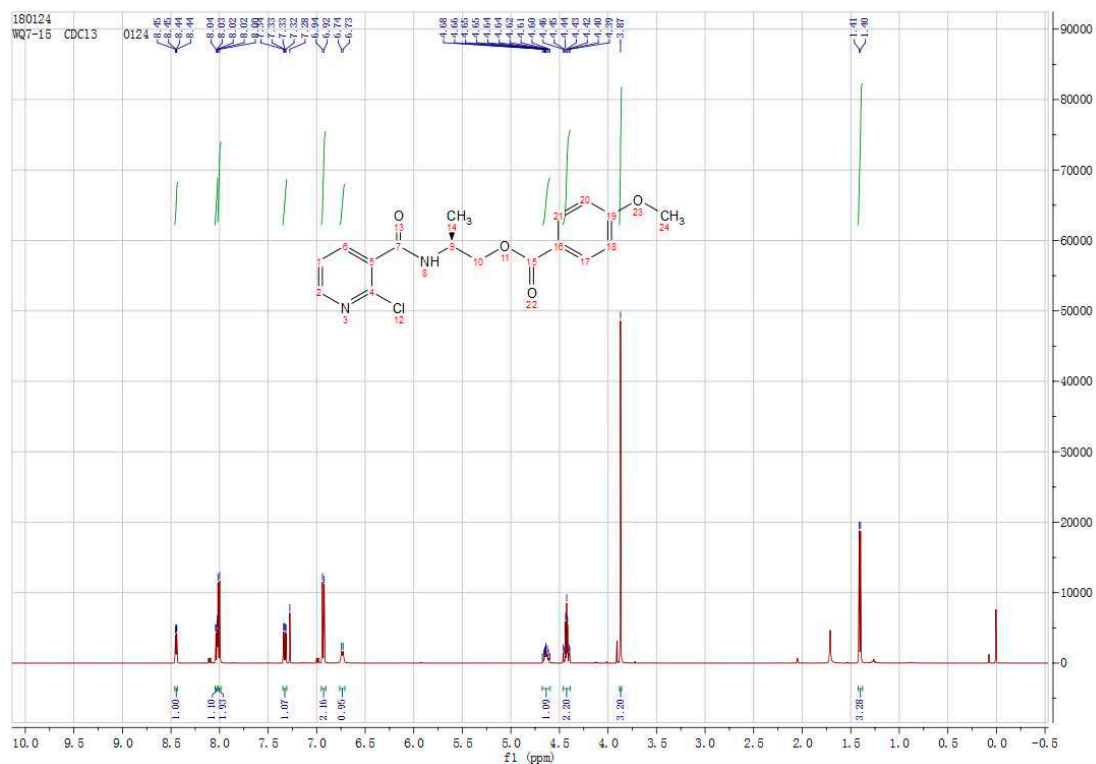

<sup>1</sup>H NMR of compound 3o

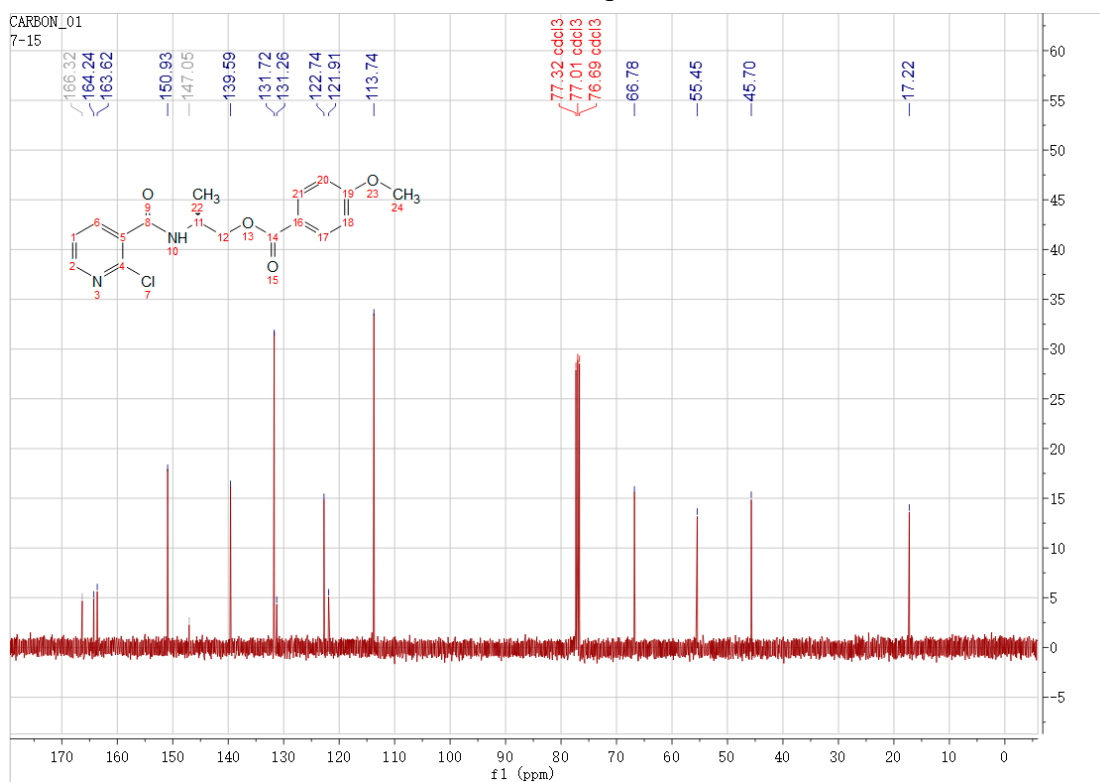

<sup>13</sup>C NMR of compound 3o

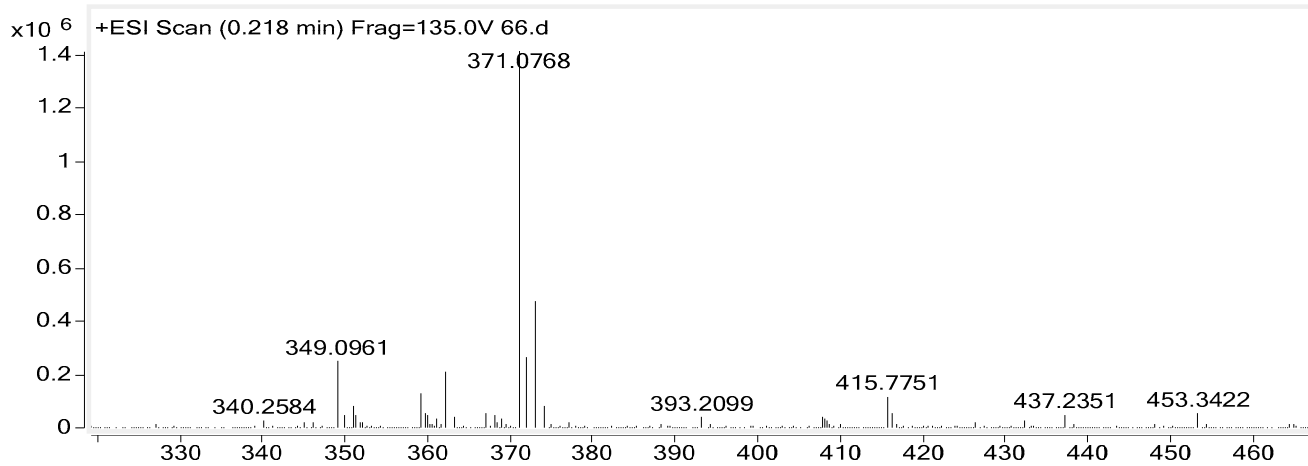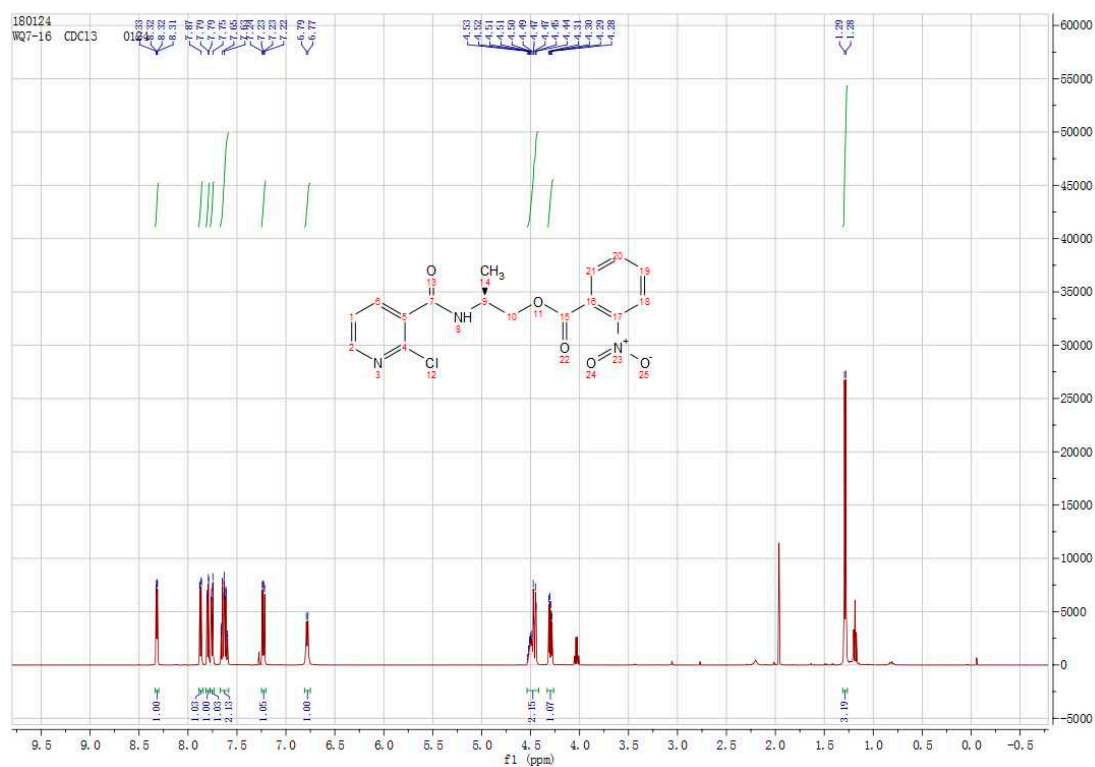



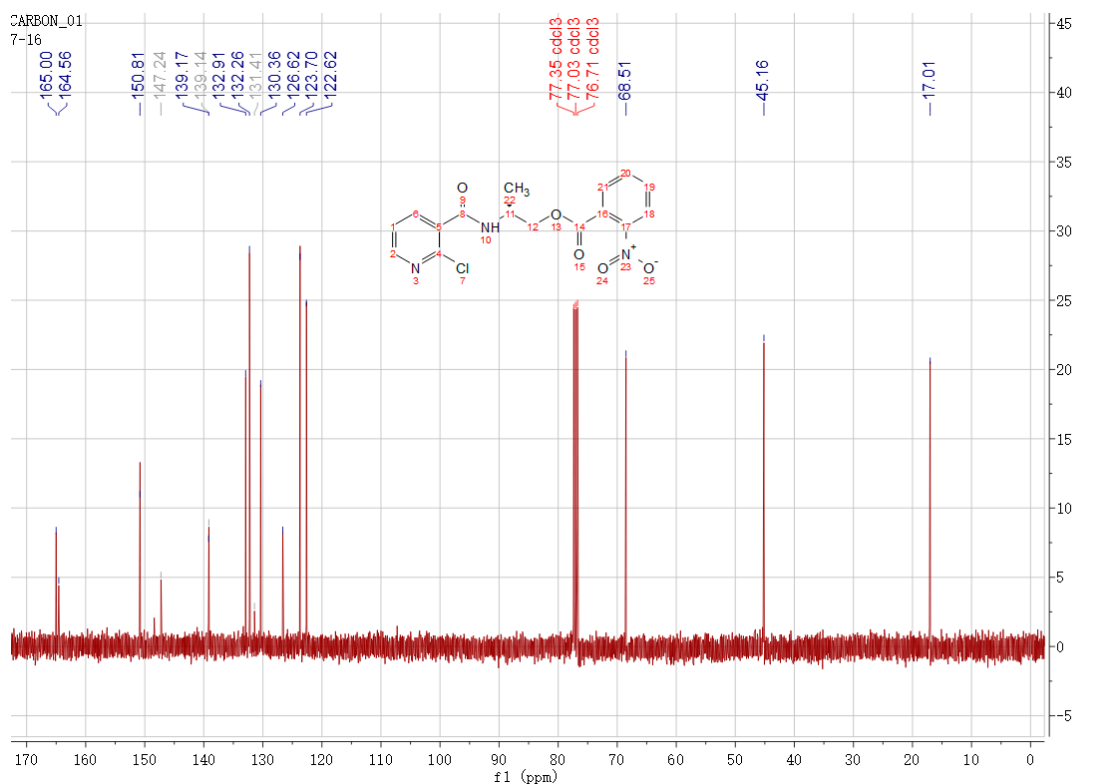

<sup>13</sup>C NMR of compound 3p

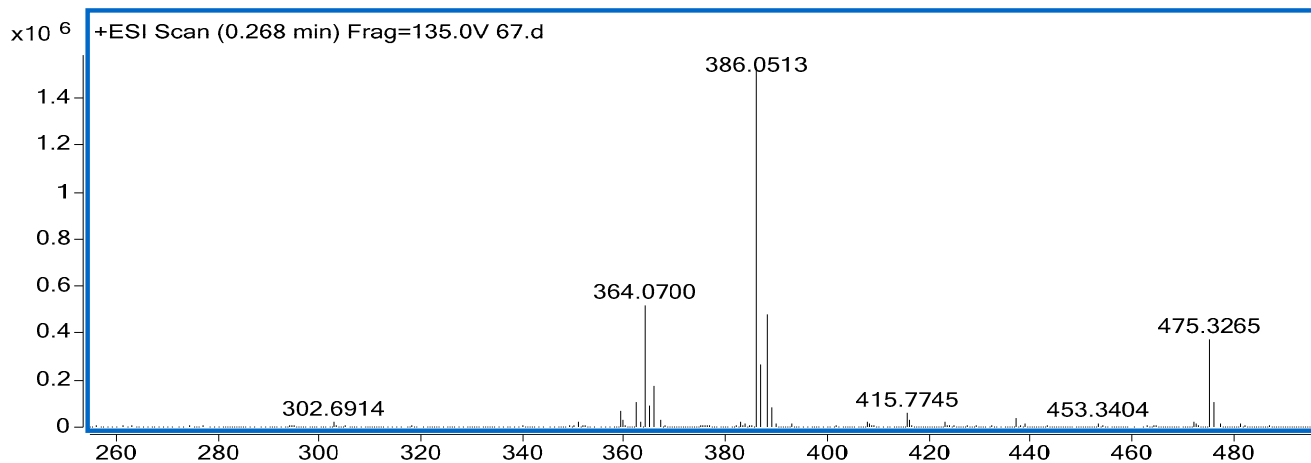

HRMS of compound 3p
